1 **Title page**

2 Molecular and Proteomic Profiles of Radioiodine Refractory Papillary Thyroid Cancer

3

4 Running title: Proteomics & RR-PTC

5

6 Author

7 Hanqing Liu <sup>1, #</sup>, Jiayi Wang <sup>1, #</sup>, Yaoting Sun <sup>2, 3, 4, #</sup>, Yan Zhou <sup>2, 3, 4, #</sup>, Pingping Hu <sup>2, 3, 4</sup>, Lu Li <sup>5, 2</sup>, Dan  
8 Yang <sup>6</sup>, Deguang Kong <sup>1</sup>, Zhiliang Xu <sup>1</sup>, Yi Zhu <sup>2, 3, 4</sup>, Tiannan Guo <sup>2, 3, 4, \*</sup>, Chuang Chen <sup>1, \*</sup>

9

10 Addresses

11 <sup>1</sup> Department of Breast and Thyroid Surgery, Renmin Hospital of Wuhan University, Wuhan University  
12 at Jiefang Road 238, Wuhan 430060, China.

13 <sup>2</sup> School of Medicine, Westlake University, Hangzhou 310024, Zhejiang Province, China.

14 <sup>3</sup> Westlake Center for Intelligent Proteomics, Westlake Laboratory of Life Sciences and Biomedicine,  
15 Hangzhou 310024, Zhejiang Province, China.

16 <sup>4</sup> Research Center for Industries of the Future, School of Life Sciences, Westlake University, Hangzhou  
17 310024, Zhejiang Province, China.

18 <sup>5</sup> College of Pharmaceutical Sciences, Zhejiang University, Hangzhou 310024, China.

19 <sup>6</sup> Department of Cardiology, the Second Affiliated Hospital of Chongqing Medical University,  
20 Chongqing 400010, China.

21

22 # Equal contribution.

23

24 \* Correspondence:

25 Prof. Chuang Chen, M.D.,

26 Department of Thyroid and Breast Surgery,

27 Renmin Hospital of Wuhan University,

28 Wuhan University at Jiefang Road 238, Wuhan 430060, RP China.

29 Tel: +86(0)27 88041911, Fax: +86(0)27 88041911, Email: chenc2469@whu.edu.cn.

30

31 Prof. Tianna Guo, Ph.D.,

32 Westlake Laboratory of Life Sciences and Biomedicine,

33 School of Medicine,

34 Westlake University (Yunqi Campus) at No. 18 Shilongshan Rd., Hangzhou 310024, PR China,

35 Tel: +86(0)571 8688 6859, Fax: +86(0)571 8688 6859, Email: guotiannan@westlake.edu.cn.

36

37 **Abstract and keywords**

38 Abstract:

39 Background: Despite the generally favorable prognosis of papillary thyroid cancers (PTCs) following  
40 surgery with/without radioactive iodine (RAI) therapy, approximately one-third of patients  
41 experiencing recurrence and metastasis eventually develop resistance to RAI, leading to poor  
42 outcomes. However, the mechanisms underlying RAI-refractoriness remain elusive. This study aimed  
43 to assess the molecular and proteomic characteristics of RAI-refractory PTC (RR-PTC) for deeper  
44 insights.

45 Methods: The medical records were reviewed for the selection and grouping of RR-PTC patients and  
46 RAI-sensitive controls. RR-PTC patients were divided into three subgroups: continuous RAI uptake  
47 (ID), loss of uptake at the first I-131 treatment (iDF) and lost gradually (iDG). Proteomic profiling and  
48 targeted next-generation sequencing were performed on primary lesions. The incidence of gene  
49 mutations and fusions was compared across groups. Bioinformatic analysis was subsequently  
50 conducted to identify the differentially expressed proteins and enriched pathways.

51 Results: Forty-eight PTC patients with recurrence and/or metastasis were included. The expression  
52 profiles of the RR-PTC and control groups were similar. In the subgroup comparison, enriched  
53 pathways related to MAPK and TNF signaling were associated with negative I-131 uptake and tumor  
54 tolerance with positive I-131 uptake. The *BRAF*<sup>V600E</sup> mutation was less common in the ID group,  
55 whereas the *TERT* promoter mutation was more common in the iDF group. *NCOA4-RET* fusion was  
56 more common in the ID group.

57 Conclusion: The present study constructed the first proteomic profile of RR-PTC. The identified  
58 proteins and pathways may be promising biomarkers and drug targets. Gene alterations can aid in the  
59 early diagnosis of RR-PTC.

60

61 Keywords: thyroid carcinoma, radioactive iodine, refractoriness, proteomics, NGS, *RET/PTC3*.

62

## 63 1 Introduction

64 Thyroid cancer ranks eighth among female malignancies (1). Its incidence has increased threefold or  
65 greater during the past four decades in many countries (2, 3). Papillary thyroid cancer (PTC) is the  
66 most common histological type and accounts for 70-96% of all thyroid cancers (3, 4). Most patients  
67 with PTC achieve complete remission after undergoing lobectomy or total thyroidectomy with/without  
68 neck dissection. However, approximately half of PTC patients present with aggressive tumor  
69 behaviors, such as extrathyroidal extension, aggressive histology, vascular invasion, multiple lymph  
70 node metastases, and distant metastases (5, 6). These patients have an intermediate or high risk of  
71 recurrence and are thus considered or recommended for postsurgical radioactive iodine (RAI) therapy  
72 (7). Unfortunately, in case of recurrence or metastasis, one to two-thirds of patients in this subset  
73 ultimately develop RAI-refractoriness (RAIR), especially those with a high risk of recurrence (8). RAI  
74 therapy barely improves patient prognosis under these conditions. The 10-year survival rate of patients  
75 with RAI-refractory PTC (RR-PTC) has decreased to 20-65%, and their life expectancy has  
76 substantially decreased (8, 9).

77 Currently, the diagnosis of RR-PTC depends on an I-131 whole-body scan (WBS) and evidence of  
78 regional and/or distant metastatic lesions (7). Owing to the high affinity of thyroid follicular cells for  
79 iodine, radioactive isotopes are concentrated in PTC cells and exert a tumor-killing effect by emitting  
80  $\beta$ -rays. In most cases, two or more I-131 WBSs are required for the final confirmation of RAIR. Given  
81 that the routine time interval between two I-131 WBSs is six months (10), the diagnosis of RAIR is  
82 made nine to twelve months after the initial surgery. The time lag postpones the start of systemic  
83 therapy (e.g. multi-kinase inhibitors, MKIs) and/or local treatments. Early identification of the RAIR  
84 can avoid unnecessary RAI therapy and thus improve patient prognosis by shifting to alternative  
85 treatments.

86 Many studies have focused on the early diagnosis of RAIR cancer during the past decade. Positron  
87 emission tomography (PET) is a valuable tool. Previous studies have shown that the negative I-131 and  
88 positive F-18-FDG uptake are indicative of the RAIR (11). In addition to radiological tools, *BRAF*<sup>V600E</sup>  
89 and *TERT* promoter mutations can also contribute to the diagnosis of RAIR. A previous retrospective  
90 study revealed that a combination of *BRAF*<sup>V600E</sup> and *TERT*p mutations, which presented in one-fifth of  
91 the PTC cohort, predicts RR-PTC at a positive predictive value of 97.4% (12). However, for  
92 approximately 80% of patients without the genetic duet, the negative predictive value was only 47.6%.  
93 A subsequent study revealed that 52.9% of patients with the genetic duet presented with RAIR (13).  
94 Generally, several factors, including high cost and unsatisfactory accuracy, have restricted the use of  
95 these diagnostic tools in clinical practice. In addition, although the RAIR is related to gene alterations  
96 in clinical studies (14, 15), the mechanism underlying refractoriness is not fully understood. For  
97 example, the NIS protein was not necessarily downregulated. It can be upregulated and exert a non-  
98 pump pro-tumorigenic effect on thyroid cancer cells (16).

99 Proteins are important participants in tumorigenic processes and dedifferentiation. Mass-based  
100 proteomics is a rapidly developing technique that facilitates comprehensive investigations into  
101 molecular activities and biological processes involved in cancer initiation and progression. Recently,  
102 proteomics has been used in several areas of thyroid cancer research, including discrimination of  
103 benign and malignant nodules, subtype identification, and risk stratification (17, 18). During the past

104 two years, Sun *et al.* constructed a comprehensive thyroid tissue proteomic spectral library and  
105 distinguished between follicular adenomas and follicular thyroid carcinomas (19). In addition, Shi *et al.*  
106 plotted the multi-omic atlas of medullary thyroid carcinoma via the proteomic technique (20). The  
107 proteomic profile of RR-PTC has not yet been revealed, which may help improve the early diagnosis of  
108 RR-PTC in clinical practice and understand the mechanism of RAIR.

109 This study aimed to construct 23-gene panel-based molecular and proteomic profiles of RR-PTC and to  
110 identify promising biomarkers related to RAIR, which could aid in early identification and drug target  
111 selection.

## 112 **2 Results**

### 113 2.1 Patient cohort

114 Forty-eight patients with locoregional or distant metastatic PTCs were included in our study (Table 1).  
115 The patients in the RR-PTC group were slightly older than those in the control group ( $P = 0.421$ ).  
116 Interestingly, all five patients  $\geq 55$  years old were in the RR-PTC group. Although females were more  
117 common in the control group (72.7% vs. 54.1%,  $P = 0.319$ ), the difference was not significant. In  
118 addition, no differences were found in the tumor diagnosis, smoking status or alcohol consumption,  
119 body mass index or the incidence of concomitant thyroid diseases between the two groups.

120 The histopathological subtypes of PTC were identically distributed between the two groups. No  
121 significant differences were found in terms of tumor size, multifocality or bilateral lesions. The  
122 incidence of extrathyroidal extension (ETE) was greater in the RR-PTC group with marginal statistical  
123 significance ( $P = 0.095$ ). Owing to differences in age and ETE, T2-4 categories were more common in  
124 patients with RR-PTC (91.9% vs. 63.6%,  $P = 0.039$ ). The presence of lymph node metastatic lesion  
125 (LNM) was similar in the two groups, but distant metastasis was much more common in the patients  
126 with RR-PTC (56.8% vs. 9.1%,  $P = 0.006$ ). Consequently, higher AJCC stages were observed in RR-  
127 PTC patients ( $P = 0.001$ ). Compared with patients in the control group, patients in the RR-PTC group  
128 received larger doses of I-131 after the initial resection of primary tumors. Notably, all six patients who  
129 died were in the refractory group.

### 130 2.2 Molecular profile of PTCs correlated with I-131 resistance

131 A total of 23 genes were sequenced (Sup table S1). Four genes were found to harbor driver mutations  
132 (Table 2). The  $BRAF^{V600E}$  mutation was identified in 25 samples (56%), with no significant difference  
133 between the RR-PTC and the control groups (54.3% vs. 60.0%,  $P = 1.000$ ). All six samples with  
134  $TERTp$  mutations (17.1% vs. 0%,  $P = 0.312$ ) were in the RR-PTC group. In addition,  $RET$  and  $TP53$   
135 mutations were found in one and two patients, respectively.  $RAS$  mutations, including  $HRAS$ ,  $KRAS$  and  
136  $NRAS$ , were not detected in any samples. In addition, four kinds of gene fusions were found, namely,  
137 eight samples with  $NCOA4-RET$ , two with  $CCDC6-RET$ , three with  $ETV6-NTRK3$  and one with  $STRN-$   
138  $ALK$ . Fusions were more frequent in the control group (28.6% vs. 40.0%,  $P = 0.700$ ), whereas  $RET-$   
139 related fusions were almost equally distributed (22.9% vs. 20.0%,  $P = 1.000$ ). However, no significant  
140 differences in the expression of these genes were found between the two groups.

141 The forty-five samples were then divided into four subgroups. The *BRAF*<sup>V600E</sup> mutation was less  
142 common in the continuous RAI uptake (ID) group (11.1%,  $P < 0.05$ ), whereas the *TERTp* mutation was  
143 more frequent in the loss of uptake at the first I-131 treatment (iDF) group (33.3%,  $P < 0.05$ ). Notably,  
144 *NCOA4-RET* fusion was more common in the ID group (44.4%,  $P < 0.05$ ).

145 The present study further evaluated the associations between gene variants and I-131 uptake. The  
146 samples in the ID and RAI-sensitive PTC (Id) groups were categorized as positive for I-131 uptake.  
147 *BRAF*<sup>V600E</sup> mutation was more frequent in the negative I-131 uptake group with statistical significance  
148 (69.2% vs. 37.8%,  $P = 0.039$ ). The incidence of *TERTp* mutations was also greater in this group (19.2%  
149 vs. 5.3%,  $P = 0.222$ ). In contrast, fusions were more common in the positive uptake group (23.1% vs.  
150 42.1%,  $P = 0.206$ ).

151 The distribution of gene variants with unknown clinical significance was also assessed (Sup table S2).  
152 The four mutations were located on *ATM* (c.1236-2A>T), *PTEN* (c.402G>A) and *RET* (c.2071G>A and  
153 c.2671T>G). Three variants were more common in the RR-PTC group, except for *PTEN* c.402G>A,  
154 although the difference was not statistically significant. In subgroup analysis, the incidence of *PTEN*  
155 c.402G>A was greater in the ID group (22.2%,  $P < 0.05$ ). In addition, *PTEN* c.402G>A was associated  
156 with positive I-131 uptake with marginal significance (0% vs. 15.8%,  $P = 0.068$ ).

### 157 2.3 Overview of the proteomic profiling

158 A total of 9769 proteins were identified in 168 tissue slides from 73 patients. (Sup figure 1A). The  
159 principal component analysis (PCA) plot indicates no observable batch effect during data acquisition  
160 (Sup figure 1B). Tumor tissues mixed with little difference but negative lymph nodes were clustered  
161 (Sup figure 1C). The  $R$  values of correlation analyses exceeded 0.97 in both intra-batch and inter-batch  
162 tests, indicating high technical stability across the data acquisition (Sup figure 1D&E). Overall, no  
163 observable batch effect was detected (Sup figure 1F). Next, a filtering criterion was applied to select  
164 proteins with missing values less than 50%. These 7406 filtered proteins were then subjected to data  
165 normalization and outlier substitution (Sup figure 2A-C). After ID conversion, an expression profile  
166 encompassing 7394 proteins was compiled (Sup figure 2D). The median tumor purity was 76.2% (Sup  
167 figure 2E), indicating the reliability of our dataset for further analysis.

168 Subsequently, the original PTC lesions were clustered using dimensionality reduction based on the  
169 global proteomic profiles. The RAI-sensitive samples were more tightly clustered than the RR-PTC  
170 samples (Figure 1A). The overlap of the two groups might be explained by the similarity between  
171 tumor tissues and the intrinsic heterogeneity of RR-PTC samples. To minimize potential heterogeneity,  
172 RR-PTCs were furtherly divided into three subgroups (iDF, iDG and ID). The diversity of the ID group  
173 was the lowest among the three subgroups, while the diversity of the RAI uptake lost gradually (iDG)  
174 group was the highest (Figure 1B). Interestingly, when labeled with the *BRAF*<sup>V600E</sup>-mutation status,  
175 samples in the two groups were separately clustered (Figure 1C).

176 A total of 107 differentially expressed proteins (DEPs) with  $P$  values  $< 0.05$  and absolute fold change  
177 (FC)  $> 1.414$  were identified (Figure 1D). Eighty-nine proteins were upregulated in the RR-PTCs,  
178 whereas the remaining eighteen proteins were downregulated. The top upregulated protein in the RR-  
179 PTCs was KRT71 ( $\log_2FC = 1.422$ ). Interestingly, the top downregulated protein also belonged to the  
180 keratin family (KRT16,  $\log_2FC = -0.955$ ). Samples were clustered unsupervisedly based on the 107  
181 DEPs and then labeled with clinicopathological features (Figure 1E). The borders of the

182 clinicopathological labels were generally indistinct. However, the thyroid differentiation score (TDS)  
183 and extracellular signal-regulated kinase (ERK) score were correlated with the groups to some extent  
184 (Figure 1F). The TDS was lower in the RR-PTC group, which could indicate poorer differentiation ( $P$   
185 = 0.288). Conversely, the ERK score was greater in the RR-PTC group ( $P$  = 0.215). Unfortunately,  
186 none of these scores reached statistical significance.

187 Gene set enrichment analysis (GSEA) revealed 64 pathways with statistical significance (Sup figure  
188 3A). Twenty-nine pathways with positive normalized enrichment scores (ESs) were upregulated in RR-  
189 PTC samples. The pathway with the greatest increase was gamma carboxylation hypusine formation  
190 and arylsulfatase activation (nES = 1.687). In addition, Akt phosphorylates targets in the cytosol was  
191 also upregulated (nES = 1.552). Notably, *RAS* processing was downregulated (nES = -1.728). The  
192 Kyoto Encyclopedia of Genes and Genomes (KEGG) database was also used for the annotation of  
193 pathways closely related to oncogenesis and dedifferentiation (Sup figure 3B). P53 signaling was  
194 significantly enriched (nES = 1.5440,  $P$  = 0.0136). Interestingly, the MAPK signaling pathway showed  
195 a slight positive correlation with RR-PTCs (nES = 1.2623,  $P$  = 0.1642). The gene set variation analysis  
196 (GSVA) results supported the above results (Sup figure 3C).

197 A previously published study assessed the transcript profiles of RR-PTC via a gene microarray (21).  
198 The DEPs identified in the present study were assessed via this profile. Only three DEPs were  
199 dysregulated (Sup figure 3D). *BET1* and *C11orf96* were downregulated in the RR-PTC group, whereas  
200 *SLC4A9* was greater. Notably, the regulation direction of *BET1* and *SLC4A9* was consistent with the  
201 results of the present study, but *C11orf96* was oppositely expressed in the two analyses. GSVA revealed  
202 two differentially downregulated pathways, none of which were enriched in our study (Sup figure  
203 3E&F).

204 To assess the spectral change in RR-PTC, the Id, ID and iDF subgroups were defined as having low,  
205 intermediate and high severity, respectively. A total of 403 proteins with significance difference were  
206 divided into six clusters (Sup figure 4). In two clusters, 160 proteins were monotonically regulated  
207 (Sup figure 5A). Collagen biosynthesis and modifying enzymes were significantly enriched (Sup figure  
208 5B&C). Regulation of protein autophosphorylation and regulation of extrinsic apoptotic signaling  
209 pathway were also associated with the severity of RR-PTC.

#### 210 2.4 Proteomic biomarkers and pathways associated with I-131 uptake

211 For analysis of proteomic biomarkers and the underlying mechanisms for the loss of I-131 uptake in  
212 PTC, two subgroups, ID and iDF, were included in the subsequent analysis. The ability of these two  
213 groups to take up I-131 was completely different at the first radiotherapy. The demographic and  
214 clinicopathologic characteristics of the two groups were roughly comparable (Sup table S3). Since the  
215 diagnosis of RR-PTC in the ID group required multiple rounds of I-131 treatment, the cumulative dose  
216 of I-131 was inevitably greater than that in the iDF group ( $P$  = 0.001).

217 Although the ID and iDF groups overlapped with each other to some extent, a total of 145 DEPs were  
218 identified (Figure 2A&B). Ninety-five proteins were upregulated in the ID group, whereas the  
219 remaining 50 proteins were highly expressed in the iDF group. The 145 DEPs could barely separate the  
220 two groups. The TDS was greater in the ID group, whereas the ERK score was lower. However, none  
221 of these scores reached statistical significance (Figure 2C&D).

222 Pathway enrichment analysis was then conducted. Only seven pathways in the KEGG database were  
223 significantly enriched. Among the seven pathways, glutathione metabolism and Notch signaling were  
224 enriched in the ID group whereas TGF- $\beta$  signaling and ECM receptor interaction were enriched in  
225 the iDF group (Figure 2E). Fifty-one pathways in the Reactome database were significantly enriched.  
226 The top enriched pathway was “activated TAK1 mediates P38 MAPK activation” (Figure 2F). In  
227 addition, TNF signaling, glutathione conjugation and several MAPK-related pathways, including  
228 ERK/MAPK targets and prolonged ERK activation events, were correlated with positive I-131 uptake.

229 The results of pathway enrichment were then assessed via GSEA. Sixty-three pathways were  
230 significantly enriched and 18 of these pathways overlapped with the GSEA results (Figure 3A). After  
231 the associations between pathways and tumor progression were evaluated, sixteen pathways were  
232 found to play roles in the loss of I-131 uptake in PTC, eleven of which overlapped with the GSEA  
233 results (Figure 3B). Six pathways were closely related to MAPK signaling. Three pathways are  
234 associated with transforming growth factor- $\beta$  activated kinase 1 (TAK1) signaling. In addition, one  
235 pathway was correlated with both MAPK and TAK1 signaling. The other six pathways involved  
236 glutathione metabolism, TNF signaling and MET proto-oncogene (MET) signaling. Most proteins in  
237 these pathways were not dysregulated (Figure 3C).

238 The results were validated with a transcriptomic profile of RR-PTCs (GSE151179). The samples in  
239 GSE151179 were categorized as ID or iD based on their I-131 uptake. The iD group was not  
240 subdivided into iDF or iDG since the information was not provided. Three common differentially  
241 expressed genes (DEGs) were identified (Sup figure 6A). However, the regulatory direction was  
242 completely different. GSEA revealed five common pathways (Sup figure 6B), and the direction of the  
243 change was consistent between the two profiles. Notably, three TAK1-associated pathways were  
244 significantly enriched. All genes involved in the 16 selected pathways and these five common pathways  
245 were tested. Only three genes were differentially expressed between the two groups (Sup figure 6C).

246 Immune analysis revealed an abundance of memory B cell and a deficiency of macrophage and  
247 immature T cell in the ID samples (Sup figure 7A). Notably, eosinophils were more abundant in RAI-  
248 sensitive samples compared to RR-PTCs. However, immunohistochemistry results did not show any  
249 statistically significant differences (Sup figure 7B).

## 250 2.5 Proteomic biomarkers and pathways for different responses to positive I-131 uptake

251 The data of twenty-one patients in the ID group and the Id group (or control group) were compared to  
252 determine the potential mechanisms underlying the different responses to positive I-131 uptake in PTC  
253 patients. No significant differences in demographic or tumor features were found, except for a greater  
254 incidence of ETE in the ID group ( $P = 0.035$ ) (Sup table S4). More distant metastases were found in  
255 the ID group (80% vs. 9.1%,  $P = 0.002$ ), and consequently, the disease stages were greater ( $P < 0.001$ ).  
256 According to the criteria of the ID group, the cumulative I-131 dose was inevitably greater ( $P < 0.001$ ).

257 The two groups could be distinctly separated from each other (Figure 4A). Twenty-one samples were  
258 roughly divided into two groups with 125 DEPs identified (Figure 4B&D). No significant differences  
259 were found in the TDS, ERK score, T cell infiltration score (TIS), immune infiltration score (IIS) or  
260 immune cytolytic activity score (CYT) (Figure 4C).

261 GSEA revealed twelve enriched pathways based on KEGG annotations. The P53 signaling pathway

262 and mTOR signaling pathway were both significantly upregulated in the RAI-resistant samples (Figure  
263 4E). Interestingly, inositol phosphate (IP) metabolism was also activated in the ID group ( $P = 0.0190$ ).  
264 No significant difference was revealed in the MAPK signaling pathway. Forty-five pathways were  
265 significantly enriched according to the Reactome annotation file. TP53-related pathways, including  
266 regulation of TP53 through association with co-factors ( $P = 0.0260$ ) and methylation ( $P = 0.0463$ ),  
267 were increased in ID samples (Figure 4F). TNF signaling ( $P = 0.0188$ ) and its participant TNFR1-  
268 induced NF-kappa-B signaling pathway ( $P = 0.0021$ ) were both associated with RAI uptake and  
269 resistance. In addition, the pathway “activated TAK1 mediates p38 MAPK activation” was closely  
270 related to RAI-resistance ( $P < 0.0001$ ). An increase in IP metabolism was also detected ( $P = 0.0081$ ).

271 GSEA was conducted to verify the previous results. A total of 49 pathways were enriched with  
272 significant differences, eleven of which overlapped with previous results (Figure 3D). After the search  
273 and selection, four clusters comprising thirteen pathways were pooled for subsequent analysis (Figure  
274 3E). Eight of the thirteen pathways were also dysregulated according to GSEA. Thirty-nine proteins  
275 involved in TNF signaling, TAK1-related pathways, plasma lipoprotein remodeling and IP-related  
276 pathways were identified with an absolute FC > 1.2 (Figure 3F).

277 The expression levels in the transcriptomic profiles of the ID and Id groups were then compared for  
278 validation. Only PGS1 was downregulated in the ID group (Sup figure 6D), which was consistent with  
279 the proteomic data. According to the pathway analysis, only GAB1 signalosome was significantly  
280 decreased in the ID group (Sup figure 6E). However, none of the genes in the GAB1 signalosome were  
281 differentially expressed between the two groups. Three genes in the above thirteen pathways were  
282 downregulated in the ID group, in contrast to the expression pattern in the proteomic profile (Sup  
283 figure 6F).

## 284 2.6 Association of gene variance and protein expression

285 The 7394 proteins were divided into 21 modules (Figure 5A&B). *BRAF* mutation was significantly  
286 correlated with seven gene modules, among which the blue module had the highest absolute correlation  
287 coefficient (CC) ( $P = 8.4e-6$ ). The most prominent module associated with *TERTp* mutations was pink  
288 ( $P = 1.9e-3$ ). The green-yellow module was closely related to the gene fusions ( $P = 3.7e-3$ ) and the  
289 *NCOA4-RET* fusion ( $P = 0.03$ ). For gene variants of unknown significance, *ATM* c.1236-2A>T and  
290 *RET* c.2671T>G was related to the green and yellow module, respectively ( $P < 0.01$ ).

291 Biomarker proteins were then selected from the most correlated modules of each gene mutation and  
292 fusion. Since other gene mutations were generally rare (< 10%) in the present study, samples with  
293 *BRAF* mutation, *TERTp* mutation, gene fusion and *NCOA4-RET* fusion were retained for subsequent  
294 analysis. A total of 28, 32 and 39 proteins were used for model construction of *BRAF* mutations via  
295 three machine learning algorithms (LASSO, RF and SVM-RFE), and four of these proteins were  
296 common biomarkers (Figure 5C). In addition, only PTC1 and AHCYL2 were revealed to be common  
297 biomarkers for gene fusions. According to the receiver operating characteristic (ROC) curves of The  
298 Cancer Genome Atlas Thyroid Cancer (TCGA-THCA) dataset, the areas under the curve (AUCs) of  
299 three genes exceeded 0.9 (Figure 5D). PTPRE had the highest accuracy (AUC = 0.93), followed by  
300 TMEM43 (AUC = 0.92) and FN1 (AUC = 0.91). According to the merged Gene Expression Omnibus  
301 (GEO) profile, the most accurate gene was TMEM43 (AUC = 0.80), followed by FN1 (AUC = 0.73).  
302 Interestingly, PTPRE did not significantly differ. The AUCs of AHCYL2 for gene fusions in TCGA-



303 THCA and merged GEO cohorts were 0.65 and 0.68, respectively. Disease free survival analysis  
304 revealed that dysregulation of FN1 ( $P = 0.026$ ) and AHCYL2 ( $P = 0.038$ ) was associated with poor  
305 prognosis in patients with thyroid cancer (Sup figure 8).

306 To explore the potential pathways in case of *BRAF* mutation and wild-type *TERTp*, nineteen *BRAF*-  
307 mutated and *TERTp*-unmutated samples were analyzed. A total of 184 proteins were significantly  
308 different between the RAIr and control groups (Sup figure 9A&B). Several pathways, which were  
309 related to the immune response, including T cell activation, regulation of lymphocyte activation and  
310 phagocytosis, were enriched with statistical significance (Sup figure 9C). Granzyme A signaling was  
311 downregulated in *BRAF*-wild-type samples, whereas neutrophil degranulation, B cell development and  
312 phagosome formation were upregulated in *BRAF*-mutated *TERTp*-unmutated samples (Sup figure 9D).

### 313 **3 Discussion**

314 To our knowledge, the present study is the first to construct a proteomic profile of RR-PTC on primary  
315 lesions. We evaluated the differences in the expression of genes in the RAI-refractory and RAI-  
316 sensitive samples. Three genes were potential biomarkers for RR-PTC. To minimize the intrinsic  
317 heterogeneity due to different criteria, we subdivided RR-PTC primary lesions based on the response to  
318 radiotherapy and the presence of I-131 uptake. MAPK signaling was the most commonly involved  
319 pathway. TGF-beta and TAK1 signaling was revealed to be associated with the loss of I-131 uptake. In  
320 contrast, tumor necrosis factor (TNF) signaling might affect cancer cell death in positive foci. Targeted  
321 deep sequencing revealed that wild-type *BRAF* and *TERTp* mutation were associated with the ID and  
322 iDF phenotypes, respectively. *NCOA4-RET* fusion was more frequent in the ID group. With respect to  
323 protein expression and gene variance, four proteins were associated with *BRAF*<sup>V600E</sup> mutation.

324 The associations between thyroid cancer and gene variants have been widely discussed. The pathway  
325 most likely related to dedifferentiation and RAI refractoriness was MAPK signaling (22). MAPK  
326 signaling regulates cell proliferation, dedifferentiation and death. *BRAF* is an essential kinase in the  
327 cascade. The *BRAF*<sup>V600E</sup> mutation has been reported to be associated with aggressive tumor behavior  
328 and poor prognosis (23, 24). Recent studies have revealed a strong correlation between *BRAF*<sup>V600E</sup>  
329 mutation and negative iodine uptake (12, 21), which was confirmed by a meta-analysis (25). The  
330 overall prevalence of *BRAF* mutation was ~55% in our study, but ID samples were less likely to harbor  
331 *BRAF* mutation (~10%) than other subgroups. Given that *BRAF* mutation can impair the expression of  
332 the NIS protein (26), recurrent or metastatic lesions without *BRAF* mutation are prone to be positive in  
333 I-131 WBSs. Interestingly, a more recent study by Mu *et al.* revealed a lower rate of *BRAF* mutation in  
334 the “continuously RAI-avid but RAI-refractory” group (~14%) than in the partial and gradual RAI-  
335 refractory groups (27). Although few studies have subdivided RR-PTC based on different criteria, we  
336 could hypothesize that ID tumors have distinct molecular features and tumorigenic mechanisms.  
337 However, it is difficult to explain the high prevalence of *BRAF* mutation in the Id group in our study,  
338 which was not consistent with many previously published articles (27, 28). Some studies have reported  
339 no significant correlation between *BRAF* status and RAI uptake (29, 30). It was assumed that clinical  
340 pathways in different countries/regions and patient selection protocols contributed to the diverse  
341 observations to some extent (24).

342 In addition, *TERTp* mutation is a promising predictive factor for the RAIr. The prevalence of this

343 mutation was lower than that of the *BRAF* mutation, but patients harboring *TERTp* mutations had  
344 poorer prognoses and greater mortality (31). Liu *et al.* reported that the genetic duet of *BRAF* and  
345 *TERTp* mutations robustly predicted the loss of RAI avidity in PTCs with a high positive predictive  
346 value (97.4%) (12). However, the negative predictive value was lower than 50%, which limits its utility  
347 in clinical practice. Subsequent studies have shown similar but somewhat different results (13). The  
348 genetic duet could predict RAI with a positive predictive value barely higher than 50%. A recent  
349 study from Shanghai revealed that *TERT* accelerated *BRAF*-mutated thyroid cancer dedifferentiation  
350 and progression by regulating ribosome biogenesis (32). Our study also revealed a greater rate of  
351 *TERTp* mutation in the RR-PTC group. Interestingly, *TERTp* mutation was significantly more frequent  
352 in iDF samples, indicating its strong association with the loss of RAI uptake. This observation was in  
353 accordance with a previously published article (27). Since all six *TERTp*-mutated samples harbored the  
354 *BRAF*<sup>V600E</sup> mutation, we did not test the combined efficacy of the two mutations.

355 Of interest, our study revealed a significantly greater incidence of *NCOA4-RET* (*PTC3-RET*) fusion in  
356 the ID group. This phenomenon was also observed in two studies. An Italian study revealed that fusion  
357 genes (especially *RET-PTC*) were more common in ID (39%) than in iD (16%) and Id (13%) patients  
358 ( $P = 0.075$ ) (21). Mu's study revealed that the incidence of *RET*-fusions in the ID subgroup (~40%)  
359 was greater than that in other RR-DTC subgroups and the Id group (27). However, statistical  
360 significance was not reached in the above two studies. A subsequent study from Mu's institution  
361 revealed that fusion oncogenes in pediatric DTCs were associated with RAI-refractoriness ( $P = 0.017$ )  
362 (33). But *RET*-fusions were not analyzed separately. The radioactive isotope is concentrated in thyroid  
363 epithelium-derived tumor cells and exerts tumor-killing effect by emitting  $\beta$ -rays. Considering that *RET*  
364 rearrangements can activate its kinase and inhibit apoptosis via the MAPK and PI3K signaling  
365 pathways (34), the apoptosis triggered by radioisotope-induced DNA damage could also be impaired  
366 by *RET* alterations, especially the *NCOA4-RET* fusion. The potential causal relationship between *RET*  
367 fusion and the ID phenotype has not been verified in cell or animal experiments. Recent clinical studies  
368 have shown that the *RET* fusion-directed therapy can restore RAI avidity in patients with RR-PTC (35,  
369 36).

370 The accuracy of gene mutations and fusions are helpful but not satisfactory. Proteomic analysis was  
371 conducted to identify promising biomarkers related to the RAI. Although the expression differences  
372 between phenotypes were generally not obvious, some signaling pathways were significantly enriched.  
373 In the comparison of the RAI-sensitive and RAI-refractory groups, P53 signaling was the pathway  
374 most likely associated with the loss of iodine uptake. Although some scholars have suggested that  
375 *TP53*-mutated follicular adenomas are precursors for the dedifferentiation of anaplastic thyroid cancer  
376 (37), few studies have investigated the correlation between the RAI and mutations in P53 signaling.  
377 At that time, we assumed that the heterogeneity in RR-PTC reduced the power of the test. In the  
378 subsequent comparisons of subgroups (ID vs. iDF and ID vs. Id), enriched pathways clustered into  
379 several major pathways, including the MAPK signaling and TNF signaling pathways. The MAPK  
380 pathway is strongly related to thyroid cancer behaviors, and *BRAF* mutation impairs the expression of  
381 the NIS protein by deacetylating its gene promoter histones (26). MAPK inhibitors and histone  
382 deacetylase inhibitors can restore iodine uptake and re-differentiate PTC cells (38, 39). Interestingly,  
383 our study revealed that TAK1-associated pathways were also correlated with that RAI. A recent study  
384 suggested that silencing TAK1 inhibited the proliferation and migration of thyroid cancer cells via that  
385 suppression of p38 MAPK signaling (40). We hypothesize that TAK1 is a novel potential molecular

386 target of RAIR. The TNF signaling is another pathway of interest. TNF is an important cytokine that  
387 triggers inflammation. A retrospective study by Gheorghe *et al.* suggested that TNF- $\alpha$  might exert  
388 different antitumor effects in response to RAI therapy depending on the patient's immune profile (41).  
389 The activation of TNF signaling might restore I-131 uptake and promote redifferentiation in thyroid  
390 cancer cells. Unfortunately, most proteins involved in these pathways did not significantly differ.

391 Several previous studies have plotted the molecular and omic atlas of RR-DTC (Sup table S6). Sabra  
392 and Shobab independently constructed the genomic landscape for RR-DTC (42, 43). Mutations in the  
393 MAPK signaling pathway accounted for ~50% of oncogenic drivers, which was similar with our  
394 results. In 2020, Colombo *et al.* constructed molecular and gene/miRNA profiles for RR-PTC (21).  
395 *BRAF* mutation was more frequent in the RAI-negative RR-PTC group. Although PTCs were clearly  
396 distinguished from normal thyroid tissues, no distinct expression patterns were found between RAI-  
397 refractory and RAI-sensitive PTCs. In general, our results were consistent with those of Colombo's  
398 study. A distinguishable feature for RAIR was not found based on either the mRNA/miRNA or protein  
399 profile, regardless of subclassification. The insufficient sample size may partly explain this  
400 phenomenon. One hypothesis is that the RAIR occurs during recurrence and metastasis. The  
401 hypothesis, however, is not convincing in the presence of some RAI negative lesions at the first I-131  
402 treatment. Another competing hypothesis is that the underlying mechanisms of the RAIR are trivial and  
403 are covered by the heterogeneity of other tumor behaviors. More homogenous samples and proper  
404 subclassification are needed to eliminate confounding effects and uncover the underlying mechanisms  
405 involved. Two precursor studies provided novel insights into the proteomic expression of RR-PTC but  
406 were limited by small sample sizes and the lack of primary tumors (44, 45).

407 The current study has several shortcomings. First, although the medical records of more than ten  
408 thousand patients were reviewed thoroughly by independent researchers, the intrinsic nature of this  
409 single-center, retrospective study and the relatively small sample size limit the generalizability of our  
410 conclusions. In addition, the lack of Benjamini-Hochberg correction for differential expression analysis  
411 undermined the reliability of the results. In addition, due to the lack of previous proteomic profiles,  
412 potential protein biomarkers were tested with several external transcriptomic profiles. The consistency  
413 of expression across mRNAs and corresponding proteins is debatable (20). Moreover, FTC samples  
414 and metastatic lesions were excluded from the present study because of the small sample size and  
415 potential histopathological heterogeneity. The potential biomarkers and mechanisms were not verified  
416 with *in vivo* experiments. The above observations of our study could be confirmed with multicenter  
417 large-sample proteomic profiling. Cell and animal experiments could help verify our results.

418 In conclusion, a proteomic profile based on RR-PTC primary lesions was constructed for the first time  
419 in the present study. Our current work improves the molecular and biological understanding of RR-  
420 PTC, which could enlighten future preclinical and clinical studies toward molecule-guided treatment.  
421 The dataset created in this study could serve as an important resource for further investigations of RR-  
422 PTC biology and therapeutic targets.

## 423 4 Patients and Methods

### 424 4.1 Study design and ethics approval

425 This retrospective study was conducted at Renmin Hospital of Wuhan University. The Institutional  
426 Ethical Committee of the hospital reviewed and approved the study design (No. WDRY2021-K032).  
427 The requirement for obtaining informed consent from the involved patients was waived due to the  
428 retrospective nature of the study. The study was conducted in accordance with the Declaration of  
429 Helsinki (46). The study was performed in accordance with the STROBE checklist for case-control  
430 study (version 4).

### 431 4.2 Patient and tissue selection

432 The medical records of patients who were diagnosed with thyroid cancer at our tertiary center from Jan.  
433 1<sup>st</sup>, 2016 to Dec. 30<sup>th</sup>, 2022 were reviewed (Figure 6A). Patient demographic and clinicopathological  
434 characteristics, laboratory test results and radiological results were collected by two researchers and  
435 independently evaluated. During the initial screening, patients who a) had incomplete medical records  
436 and b) did not undergo I-131 WBS were excluded. In the second round of assessment,  
437 histopathological data and radiological images, including chest computed tomography (CT), cervical  
438 magnetic resonance imaging (MRI), whole-body bone scanning and positron emission tomography  
439 (PET), were used to evaluate local and distant metastasis at the first admission for surgery. Patients  
440 without cervical or distant metastasis at diagnosis were excluded from the subsequent evaluation.  
441 Patients with RAI uptake limited to thyroid bed and disease remission were also excluded. In the final  
442 assessment, RAI uptake was determined by I-131 WBSs or I-131 single photon emission computerized  
443 tomography (SPECT). A total of 73 patients were identified to have locoregional or distant metastasis,  
444 which was confirmed by radiological, cytopathological and/or histopathological solid evidence.  
445 Patients with primary lesions not resected in our center or other histopathological types other than PTC  
446 were also excluded from further statistical analysis. Finally, forty-eight PTC patients with locoregional  
447 and/or distant metastasis were included in this study and their primary tumor samples (one sample from  
448 each patient) were used for subsequent analysis.

449 The included patients were then divided into two groups based on their response to RAI treatment:  
450 RAI-sensitive (RAI uptake positive and disease remission, Id) and RAI-refractory (disease persistence,  
451 Figure 6B). RAI refractoriness was identified in accordance with the 2015 American Thyroid  
452 Association (ATA) guideline (7). Briefly, patients with metastatic lesions that a) did not ever  
453 concentrate RAI, b) lost the ability to concentrate RAI after previous evidence of RAI avidity, and c)  
454 concentrated in some lesions but not in others were considered to have negative RAI uptake.  
455 Individuals with d) metastatic disease despite a significant concentration of RAI were defined as  
456 having positive uptake. Owing to the potential heterogeneity of RR-PTC, patients in the RAI-refractory  
457 group were further categorized into three subgroups: a) negative RAI uptake at the first RAI treatment  
458 with disease persistence (iDF), b) RAI uptake lost gradually after previous RAI treatments with disease  
459 persistence (iDG), and c) positive RAI uptake but with disease persistence (ID). Tumor stage and the  
460 risk of recurrence were stratified using the American Joint Committee on Cancer (AJCC) staging  
461 system and the 2015 ATA guideline (7, 47).

462 Resected primary and metastatic lesions were preserved in formalin-fixed paraffin-embedded (FFPE)  
463 tissue blocks at room temperature. A total of 168 FFPE samples were collected from the above 73  
464 patients (Figure 6C). The tissue types included primary tumors, synchronous cervical LNM, LNM after  
465 I-131 treatment, negative lymph nodes, and regional and distant metastatic lesions. Hematoxylin and  
466 eosin-stained slides from all samples were reviewed by two independent pathologists with expertise in  
467 thyroid pathology. The tissue blocks with the highest tumor purity in each patient were selected for  
468 subsequent analysis. The borderlines of the tumor and adjacent tissues were carefully marked by expert  
469 pathologists.

#### 470 4.3 Proteomic data acquisition and preprocessing

471 The FFPE samples were prepared for subsequent proteomic analysis as described previously (19, 48).  
472 The samples were allocated into ten batches. The tissues were subjected to a series of manipulations,  
473 including dewaxing, rehydration and lysis, for peptide extraction and digestion via pressure cycling  
474 technology (PCT). Peptides were then quantified via a liquid chromatography (LC) system coupled  
475 with a trapped ion mobility spectrometry mass spectrometer (MS). Data-independent acquisition (DIA)  
476 files were acquired and then analyzed against a thyroid tissue specific spectral library (19) using DIA-  
477 NN (v1.8.1) (49). Correlation analysis was conducted to assess the inter-batch and intra-batch stability  
478 of data acquisition. The profile was then processed for protein filtration, imputation and ID conversion.  
479 A detailed description of proteomic data acquisition, quality control and preprocessing can be found in  
480 the supplementary methods.

#### 481 4.4 Targeted next-generation sequencing (TNGS)

482 The primary lesions from 48 patients with PTC were subjected to molecular profiling via TNGS. The  
483 protocol was performed as described previously (50). Mutations and fusions were evaluated for 23  
484 genes (Sup table S1). A detailed description of THGS can be found in the supplementary methods.

#### 485 4.5 Bioinformatic analysis

486 DEPs were identified using a multiple linear regression algorithm and analysis of variance (ANOVA).  
487 Differential expression analysis was conducted using the *limma* R package. Proteins with an absolute  
488 FC > 1.414 and a *P* value < 0.05 were defined as DEPs. The dimension of the profile was reduced and  
489 visualized using the PCA algorithm. ANOVA was used to identify proteins correlated with the severity  
490 of RR-PTC. Proteins with statistical significance were clustered using the *mfuzz* R package. Proteins in  
491 monotonically regulated clusters were regarded as DEPs.

492 Pathway enrichment analysis and gene ontology (GO) were conducted using four tools. GSEA was  
493 conducted using GSEA software to evaluate potential pathways and molecular mechanisms. For GSVA,  
494 ESs were calculated with the *GSEA* R package. Predefined gene sets were downloaded from the  
495 Reactome and KEGG databases. The top enriched GO processes were identified via the Metascape  
496 web-based platform. Another network tool, IPA, identifies most significantly relevant pathways with  
497 the overall activation or inhibition states based on DEPs.

498 Immune infiltration analysis was performed via the *CIBERSORTx*, *ESTIMATE* and *single sample*  
499 *GSEA* (*ssGSEA*) algorithms. Several scores, including the TDS, ERK score and CYT, were calculated

500 based on the normalized protein profile. TIS and IIS were calculated using the Z score-standardized  
501 ssGSEA matrix. *BRAF-RAS* score (BRS) was not calculated since no *RAS*-mutated samples were  
502 identified.

503 Weighted correlation network analysis (WGCNA) was performed to cluster genes with high correlation  
504 and assess the correlation between protein modules and gene alterations. Proteins in the modules that  
505 were highly associated with gene mutations or fusions were selected. Least absolute shrinkage and  
506 selection operator (LASSO) regression, random forest (RF), and support vector machine-recursive  
507 feature elimination (SVM-RFE) were used to identify biomarker proteins based on selected proteins.

508 Several external datasets were used for the validation of our results (Sup Table S7). GSE151179 from  
509 the GEO database included 52 samples derived from radioiodine-refractory and radioiodine-avid PTC  
510 patients. This dataset was used to verify the results related to RAI refractoriness. The associations  
511 between gene alterations and protein expression were assessed with the THCA (thyroid cancer)  
512 program from TCGA and four additional datasets from the GEO database. The predictive performance  
513 of the genes in the external datasets was evaluated with ROC curves.

514 A detailed description of the bioinformatic analysis and references to methodological articles can be  
515 found in the supplementary methods.

#### 516 4.6 Statistical analysis

517 Quantitative variables were displayed as the means  $\pm$  standard deviations or medians  $\pm$  quartiles,  
518 whereas qualitative variables were presented as numbers and ratios. The significant differences in the  
519 quantitative variables were determined via two-tailed independent *t* test or Mann-Whitney *U* test, as  
520 appropriate. The *chi*-square test was used to evaluate the differences in the distributions of qualitative  
521 variables. When multiple groups were present, the *z* test with a Bonferroni correction was used to  
522 assess the intergroup difference in every group. Statistical analysis was conducted using SPSS software  
523 (IBM, US, v26).

524

525 **Abbreviations**

526 ANOVA, analysis of variance; ATA, American Thyroid Association; AUC, area under the curve (of  
527 ROC); *BRAF*, B-Raf proto-oncogene, serine/threonine kinase; BRS, *BRAF-RAS* score; CC, correlation  
528 coefficient; COSMIC, the Catalogue Of Somatic Mutations In Cancer; CT, computed tomography;  
529 CYT, immune cytolytic activity score; DEG, differentially expressed gene; DEP, differentially  
530 expressed protein; DIA, data-independent acquisition; DTC, differentiated thyroid cancer; ECP,  
531 eosinophil cationic protein; ES, enrichment score; ERK, extracellular signal-regulated kinase; ETE,  
532 extrathyroidal extension; FC, fold change; FFPE, formalin-fixed paraffin-embedded; F-18-FDG, 2-  
533 [<sup>18</sup>F]fluoro-2-deoxy-D-glucose; GEO, the Gene Expression Omnibus database; GO, gene ontology;  
534 GS, gene significance; GSEA, gene set enrichment analysis; GSVA, gene set variation analysis; HR,  
535 hazard ratio; ID, positive RAI uptake and disease persistence; Id, RAI uptake positive and disease  
536 remission; iDF, negative RAI uptake at the first time of RAI treatment with disease persistence; iDG,  
537 RAI uptake lost gradually after previous RAI treatments with disease persistence; IIS, immune  
538 infiltration score; IP, inositol phosphate; IPA, ingenuine pathway analysis; KEGG, Kyoto Encyclopedia  
539 of Genes and Genomes; KNN, K-nearest neighbor; LASSO, least absolute shrinkage and selection  
540 operator; LC, liquid chromatography; LNM, lymph node metastatic lesion; MAPK, mitogen-activated  
541 protein kinase; MET, MET proto-oncogene; MKI, multi-kinase inhibitor; MM, module membership;  
542 MS, mass spectrometry; MRI, magnetic resonance imaging; NIS, sodium iodide symporter; PCA,  
543 principal component analysis; PCT, pressure cycling technology; PET, positron emission tomography;  
544 RAI, radioactive iodine; RAIR, RAI-refractoriness; RF, random forest; RFS, recurrence-free survival;  
545 RMA, robust multiarray average; ROC, receiver operating characteristic; RR-PTC, radioactive iodine  
546 refractory papillary thyroid cancer; SPECT, single photon emission computerized tomography;  
547 ssGSEA, single sample GSEA; SVM-RFE, support vector machine-recursive feature elimination;  
548 TAK1, transforming growth factor- $\beta$  activated kinase 1; TCGA, The Cancer Genome Atlas Program;  
549 *TERT*, telomerase reverse transcriptase; *TERTp*, *TERT* promoter; TDS, thyroid differentiation score;  
550 TIS, T cell infiltration score; TNF, tumor necrosis factor; TNGS, targeted next-generation sequencing;  
551 TOM, topological overlap matrix; WBS, whole-body scanning; WGCNA, weighted correlation  
552 network analysis.

553

554 **Disclosure**

555 Ethics approval statement

556 The Institutional Ethical Committee of the hospital reviewed and approved the study design (No.  
557 WDRY2021-K032). The requirement for obtaining informed consent from the involved patients was  
558 waived due to the retrospective nature of the study. The study was conducted in accordance with the  
559 Declaration of Helsinki.

560 Acknowledgement

561 We appreciate the great support by four expert pathologists, Dr. Xiaokang Ke, Dr. Jiakai Ren, Dr.  
562 Xiaoyan Wu and Dr. Feng Guan, and the secretary of the Pathology Department, Mrs. Lingli Xia, at  
563 Renmin Hospital of Wuhan university. We give special thanks to Dr. Jun Liang in the Department of  
564 Nuclear Medicine at Renmin Hospital of Wuhan University and Dr. Jie Tan in the Department of Breast  
565 the Thyroid Surgery at Wuhan Union Hospital for their contribution and guidance in patient selection  
566 and grouping. We thank Prof. Katherine Hoadley at the University of North Carolina at Chapel Hill for  
567 her kind help in building a profile-based scoring system. We thank Dr. Zhou Liu from the Breast Tumor  
568 Center of Sun Yat-Sen Memorial Hospital and Dr. Nancy Li from the Reactome HelpDesk for their  
569 timely replies on two independent technical problems. We pay special thanks to authors who provided  
570 the external expression profiles for validation in the present study.

571 Funding

572 This research was supported by grants from the Interdisciplinary Innovative Talents Foundation from  
573 Renmin Hospital of Wuhan University (JCRCFZ-2022-015), the Fundamental Research Funds for the  
574 Central Universities (2042019kf0229), the Natural Science Foundation of Hubei Province, China  
575 (2023AFB701), and the Thyroid Research Project for Young and Middle-aged Doctors from Bethune  
576 Charitable Foundation (JKM2022-B12). All these funds were given to Prof. Chuang Chen to cover the  
577 costs during sample collection, TNGS, proteomics and other costs related to this academic research.

578 Conflicts of interest

579 Y Zhu and TN Guo are shareholders of Westlake Omics Inc. Other authors declare no competing  
580 interests.

581 Data availability

582 The proteomic data have been deposited in the iProX database with the project ID IPX0009103001.  
583 Calculation files and additional data are available in the Mendeley database (DOI:  
584 10.17632/yfpfvktrxn.2). No custom code was produced.



585 Author contribution

586 H.L. contributed to conceptualization, data curation, formal analysis, investigation, methodology,  
587 project administration, visualization and writing - original draft. J.W. contributed to data curation,  
588 formal analysis, investigation and writing - original draft. Y.S. contributed to formal analysis,  
589 methodology, project administration, resources, software, supervision, writing - original draft and  
590 writing – review & editing. Z.Y. contributed to data curation, formal analysis, methodology, resources,  
591 software and writing - original draft. P.H. and L.L. contributed to data curation and software. D.Y.  
592 contributed to investigation, validation, visualization and writing – review & editing. D.K. and Z.X.  
593 contributed to data curation and investigation. Y.Z. contributed to supervision, validation and  
594 visualization. T.G. and C.C. contributed to project administration, resources, supervision and writing –  
595 review & editing. In addition, C.C. contributed to conceptualization and funding acquisition.  
596

597 **References**

- 598 1. Siegel RL, Giaquinto AN, Jemal A. Cancer statistics, 2024. *CA: a cancer journal for clinicians*.  
599 2024;74(1):12-49.
- 600 2. Li M, Pei J, Xu M, Shu T, Qin C, Hu M, et al. Changing incidence and projections of thyroid  
601 cancer in mainland China, 1983-2032: evidence from Cancer Incidence in Five Continents. *Cancer*  
602 *Causes & Control*. 2021;32(10):1095-105.
- 603 3. Miranda-Filho A, Lortet-Tieulent J, Bray F, Cao B, Franceschi S, Vaccarella S, et al. Thyroid  
604 cancer incidence trends by histology in 25 countries: a population-based study. *Lancet Diabetes &*  
605 *Endocrinology*. 2021;9(4):225-34.
- 606 4. Lim H, Devesa SS, Sosa JA, Check D, Kitahara CM. Trends in Thyroid Cancer Incidence and  
607 Mortality in the United States, 1974-2013. *Jama-Journal of the American Medical Association*.  
608 2017;317(13):1338-48.
- 609 5. van Velsen EFS, Peeters RP, Stegenga MT, van Kemenade FJ, van Ginhoven TM, van Balkum M,  
610 et al. Evaluating Disease-specific Survival Prediction of Risk Stratification and TNM Systems in  
611 Differentiated Thyroid Cancer. *Journal of Clinical Endocrinology & Metabolism*. 2023;108(6):E267-  
612 E74.
- 613 6. Manzardo OA, Cellini M, Indirli R, Dolci A, Colombo P, Carrone F, et al. TNM 8th edition in  
614 thyroid cancer staging: is there an improvement in predicting recurrence? *Endocrine-Related Cancer*.  
615 2020;27(6):325-36.
- 616 7. Haugen BR, Alexander EK, Bible KC, Doherty GM, Mandel SJ, Nikiforov YE, et al. 2015  
617 American Thyroid Association Management Guidelines for Adult Patients with Thyroid Nodules and  
618 Differentiated Thyroid Cancer The American Thyroid Association Guidelines Task Force on Thyroid  
619 Nodules and Differentiated Thyroid Cancer. *Thyroid*. 2016;26(1):1-133.
- 620 8. Nunes KS, Matos LL, Cavalheiro BG, Magnabosco FF, Tavares MR, Kulcsar MA, et al. Risk  
621 factors associated with disease-specific mortality in papillary thyroid cancer patients with distant  
622 metastases. *Endocrine*. 2022;75(3):814-22.
- 623 9. Durante C, Haddy N, Baudin E, Leboulleux S, Hartl D, Travagli JP, et al. Long-term outcome of  
624 444 patients with distant metastases from papillary and follicular thyroid carcinoma: Benefits and  
625 limits of radioiodine therapy. *Journal of Clinical Endocrinology & Metabolism*. 2006;91(8):2892-9.
- 626 10. Ciarallo A, Rivera J. Radioactive Iodine Therapy in Differentiated Thyroid Cancer: 2020 Update.  
627 *American Journal of Roentgenology*. 2020;215(2):285-91.
- 628 11. Sakulpisuti C, Charoenphun P, Chamroonrat W. Positron Emission Tomography  
629 Radiopharmaceuticals in Differentiated Thyroid Cancer. *Molecules*. 2022;27(15):4936.
- 630 12. Liu J, Liu R, Shen X, Zhu G, Li B, Xing M. The Genetic Duet of BRAF V600E and TERT  
631 Promoter Mutations Robustly Predicts Loss of Radioiodine Avidity in Recurrent Papillary Thyroid  
632 Cancer. *Journal of Nuclear Medicine*. 2020;61(2):177-82.
- 633 13. Cao J, Zhu X, Sun Y, Li X, Yun C, Zhang W. The genetic duet of BRAF V600E and TERT  
634 promoter mutations predicts the poor curative effect of radioiodine therapy in papillary thyroid cancer.  
635 *European Journal of Nuclear Medicine and Molecular Imaging*. 2022;49(10):3470-81.
- 636 14. Groener JB, Gelen D, Mogler C, Herpel E, Toth C, Kender Z, et al. BRAF V600E and Retinoic  
637 Acid in Radioiodine-Refractory Papillary Thyroid Cancer. *Hormone and Metabolic Research*.  
638 2019;51(1):69-75.

- 639 15. Yang X, Li J, Li X, Liang Z, Gao W, Liang J, et al. TERT Promoter Mutation Predicts  
640 Radioiodine-Refractory Character in Distant Metastatic Differentiated Thyroid Cancer. *Journal of*  
641 *Nuclear Medicine*. 2017;58(2):258-65.
- 642 16. Feng F, Yehia L, Ni Y, Chang YS, Jhiang SM, Eng C. A nonpump function of sodium iodide  
643 symporter in thyroid cancer via cross-talk with PTEN signaling. *Cancer Research*. 2018;78(21):6121-  
644 33.
- 645 17. Huang D, Zhang H, Li L, Ge W, Liu W, Dong Z, et al. Proteotypic Differences of Follicular-  
646 Patterned Thyroid Neoplasms. *Frontiers in endocrinology*. 2022;13:854611.
- 647 18. Qu N, Chen D, Ma B, Zhang L, Wang Q, Wang Y, et al. Integrated proteogenomic and  
648 metabolomic characterization of papillary thyroid cancer with different recurrence risks. *Nature*  
649 *Communications*. 2024;15(1):3175.
- 650 19. Sun Y, Li L, Zhou Y, Ge W, Wang H, Wu R, et al. Stratification of follicular thyroid tumours using  
651 data-independent acquisition proteomics and a comprehensive thyroid tissue spectral library. *Molecular*  
652 *oncology*. 2022;16(8):1611-24.
- 653 20. Shi X, Sun Y, Shen C, Zhang Y, Shi R, Zhang F, et al. Integrated proteogenomic characterization  
654 of medullary thyroid carcinoma. *Cell discovery*. 2022;8(1):120.
- 655 21. Colombo C, Minna E, Gargiuli C, Muzza M, Dugo M, De Cecco L, et al. The molecular and  
656 gene/miRNA expression profiles of radioiodine resistant papillary thyroid cancer. *Journal of*  
657 *Experimental & Clinical Cancer Research*. 2020;39(1):245.
- 658 22. Braga-Basaria M, Ringel MD. Beyond radioiodine: A review of potential new therapeutic  
659 approaches for thyroid cancer. *Journal of Clinical Endocrinology & Metabolism*. 2003;88(5):1947-60.
- 660 23. Agrawal N, Akbani R, Aksoy BA, Ally A, Arachchi H, Asa SL, et al. Integrated Genomic  
661 Characterization of Papillary Thyroid Carcinoma. *Cell*. 2014;159(3):676-90.
- 662 24. Xing M, Alzahrani AS, Carson KA, Shong YK, Kim TY, Viola D, et al. Association Between  
663 BRAF V600E Mutation and Recurrence of Papillary Thyroid Cancer. *Journal of Clinical Oncology*.  
664 2015;33(1):42-U79.
- 665 25. Luo Y, Jiang H, Xu W, Wang X, Ma B, Liao T, et al. Clinical, Pathological, and Molecular  
666 Characteristics Correlating to the Occurrence of Radioiodine Refractory Differentiated Thyroid  
667 Carcinoma: A Systematic Review and Meta-Analysis. *Frontiers in Oncology*. 2020;10:549882.
- 668 26. Zhang Z, Liu D, Murugan AK, Liu Z, Xing M. Histone deacetylation of NIS promoter underlies  
669 BRAF V600E-promoted NIS silencing in thyroid cancer. *Endocrine-Related Cancer*. 2014;21(2):161-  
670 73.
- 671 27. Mu Z, Zhang X, Sun D, Sun Y, Shi C, Ju G, et al. Characterizing Genetic Alterations Related to  
672 Radioiodine Avidity in Metastatic Thyroid Cancer. *Journal of Clinical Endocrinology & Metabolism*.  
673 2024;109(5):1231-40.
- 674 28. Anekpuranang T, Uataya M, Claimon A, Laokulrath N, Pongsapich W, Pithuksurachai P. The  
675 Association Between Radioiodine Refractory in Papillary Thyroid Carcinoma, Sodium/Iodide  
676 Symporter Expression, and BRAFV600E Mutation. *Oncotargets and Therapy*. 2021;14:3959-69.
- 677 29. Meng Z, Matsuse M, Saenko V, Yamashita S, Ren P, Zheng X, et al. TERT promoter mutation in  
678 primary papillary thyroid carcinoma lesions predicts absent or lower (131)I uptake in metastases.  
679 *Iubmb Life*. 2019;71(7):1030-40.
- 680 30. Jung CK, Jung S-H, Jeon S, Jeong YM, Kim Y, Lee S, et al. Risk Stratification Using a Novel  
681 Genetic Classifier Including PLEKHS1 Promoter Mutations for Differentiated Thyroid Cancer with  
682 Distant Metastasis. *Thyroid*. 2020;30(11):1589-600.

- 683 31. Liu R, Bishop J, Zhu G, Zhang T, Ladenson PW, Xing M. Mortality Risk Stratification by  
684 Combining BRAF V600E and TERT Promoter Mutations in Papillary Thyroid Cancer Genetic Duet of  
685 BRAF and TERT Promoter Mutations in Thyroid Cancer Mortality. *Jama Oncology*. 2017;3(2):202-8.
- 686 32. Yu P, Qu N, Zhu R, Hu J, Han P, Wu J, et al. TERT accelerates BRAF mutant-induced thyroid  
687 cancer dedifferentiation and progression by regulating ribosome biogenesis. *Science Advances*.  
688 2023;9(35):eadg7125.
- 689 33. Ju G, Sun Y, Wang H, Zhang X, Mu Z, Sun D, et al. Fusion Oncogenes in Patients With Locally  
690 Advanced or Distant Metastatic Differentiated Thyroid Cancer. *Journal of Clinical Endocrinology &*  
691 *Metabolism*. 2024;109(2):505-15.
- 692 34. Paratala BS, Chung JH, Williams CB, Yilmazel B, Petrosky W, Williams K, et al. RET  
693 rearrangements are actionable alterations in breast cancer. *Nature Communications*. 2018;9:4821.
- 694 35. Groussin L, Bessiene L, Arrondeau J, Garinet S, Cochand-Priollet B, Lupo A, et al. Selpercatinib-  
695 Enhanced Radioiodine Uptake in RET-Rearranged Thyroid Cancer. *Thyroid*. 2021;31(10):1603-4.
- 696 36. Lee YA, Lee H, Im S-W, Song YS, Oh D-Y, Kang HJ, et al. NTRK and RET fusion-directed  
697 therapy in pediatric thyroid cancer yields a tumor response and radioiodine uptake. *Journal of Clinical*  
698 *Investigation*. 2021;131(18):e144847.
- 699 37. Nikitski AV, Nikiforova MN, Yip L, Karslioglu-French E, Carty SE, Nikiforov YE. Can TP53-  
700 mutant follicular adenoma be a precursor of anaplastic thyroid carcinoma? *Endocrine-Related Cancer*.  
701 2021;28(9):621-30.
- 702 38. Fu H, Cheng L, Jin Y, Cheng L, Liu M, Chen L. MAPK Inhibitors Enhance HDAC Inhibitor-  
703 Induced Redifferentiation in Papillary Thyroid Cancer Cells Harboring BRAFV600E : An In Vitro.  
704 *Molecular Therapy-Oncolytics*. 2019;12:235-45.
- 705 39. Rothenberg SM, McFadden DG, Palmer EL, Daniels GH, Wirth LJ. Redifferentiation of Iodine-  
706 Refractory BRAF V600E-Mutant Metastatic Papillary Thyroid Cancer with Dabrafenib. *Clinical*  
707 *Cancer Research*. 2015;21(5):1028-35.
- 708 40. Zhang C, Yin G, You M, Chen H, Hu Y, Li Y, et al. Inhibitory effects of siRNA targeting silencing  
709 TAK1 gene on proliferation and migration of thyroid cancer cells and p38 MAPK signaling pathway.  
710 *Journal of Jilin Univeristy Medicine edition*. 2021;47(1):110-7.
- 711 41. Gheorghe DC, Stanciu MM, Zamfirescu A, Stanciu AE. TNF- $\alpha$  May Exert Different Antitumor  
712 Effects in Response to Radioactive Iodine Therapy in Papillary Thyroid Cancer with/without  
713 Autoimmune Thyroiditis. *Cancers*. 2021;13(14):3609.
- 714 42. Sabra MM, Dominguez JM, Grewal RK, Larson SM, Ghossein RA, Tuttle RM, et al. Clinical  
715 Outcomes and Molecular Profile of Differentiated Thyroid Cancers With Radioiodine-Avid Distant  
716 Metastases. *Journal of Clinical Endocrinology & Metabolism*. 2013;98(5):E829-E36.
- 717 43. Shobab L, Gomes-Lima C, Zeymo A, Feldman R, Jonklaas J, Wartofsky L, et al. Clinical,  
718 Pathological, and Molecular Profiling of Radioactive Iodine Refractory Differentiated Thyroid Cancer.  
719 *Thyroid*. 2019;29(9):1262-8.
- 720 44. Song H-J, Xue Y-L, Qiu Z-L, Luo Q-Y. Comparative serum proteomic analysis identified afamin  
721 as a downregulated protein in papillary thyroid carcinoma patients with non-131I-avid lung metastases.  
722 *Nuclear Medicine Communications*. 2013;34(12):1196-203.
- 723 45. Li Y, Hu F, Deng J, Huang X, Zhou C, Wu M, et al. Proteomic analysis of radioiodine-refractory  
724 differentiated thyroid cancer identifies CHI3L1 upregulation in association with dysfunction of the  
725 sodium-iodine symporter. *Oncology Letters*. 2023;25(1):36.
- 726 46. World Med A. World Medical Association Declaration of Helsinki Ethical Principles for Medical

- 727 Research Involving Human Subjects. *Jama-Journal of the American Medical Association*.  
728 2013;310(20):2191-4.
- 729 47. Perrier ND, Brierley JD, Tuttle RM. Differentiated and Anaplastic Thyroid Carcinoma: Major  
730 Changes in the American Joint Committee on Cancer Eighth Edition Cancer Staging Manual. *CA: a*  
731 *cancer journal for clinicians*. 2018;68(1):56-63.
- 732 48. Cai X, Xue Z, Wu C, Sun R, Qian L, Yue L, et al. High-throughput proteomic sample preparation  
733 using pressure cycling technology. *Nature Protocols*. 2022;17(10):2307-25.
- 734 49. Demichev V, Messner CB, Vernardis SI, Lilley KS, Ralser M. DIA-NN: neural networks and  
735 interference correction enable deep proteome coverage in high throughput. *Nature Methods*.  
736 2020;17(1):41-+.
- 737 50. Xiong Y, Li X, Li L, Li D, Yan L, Li X, et al. Application of biomarkers in the diagnosis of  
738 uncertain samples of core needle biopsy of thyroid nodules. *Virchows Archiv*. 2021;479(5):961-74.  
739  
740

741 **Tables, figures and supplementary materials**

742 Tables

743 Table 1. Demographic and clinicopathologic characteristic of included patients

| Clinicopathological features       | All patients (48) | RR-PTC (37)    | Control (11)   | <i>P</i> value |
|------------------------------------|-------------------|----------------|----------------|----------------|
| Age at diagnosis                   |                   |                |                |                |
| Years                              | 38.4 ± 12.69      | 39.2 ± 13.29   | 35.6 ± 10.49   | 0.421          |
| ≥55 y                              | 5 (10.4)          | 5 (13.5)       | 0 (0)          | 0.576          |
| Female sex                         | 28 (58.3)         | 20 (54.1)      | 8 (72.7)       | 0.319          |
| Tumor diagnosis                    |                   |                |                | 0.302          |
| Incidental                         | 22 (45.8)         | 15 (40.5)      | 7 (63.6)       |                |
| Symptomatic                        | 26 (54.2)         | 22 (59.5)      | 4 (36.4)       |                |
| Smoking or alcohol                 | 9 (18.8)          | 8 (21.6)       | 1 (9.1)        | 0.662          |
| BMI (kg/m <sup>2</sup> )           | 24.1 ± 5.36       | 24.6 ± 5.75    | 22.5 ± 3.47    | 0.261          |
| Hashimoto's thyroiditis            | 1 (2.1)           | 1 (2.7)        | 0 (0)          | 1.000          |
| Nodular goiter                     | 10 (20.8)         | 7 (18.9)       | 3 (27.3)       | 0.675          |
| Histological subtypes <sup>a</sup> |                   |                |                |                |
| cPTC                               | 39 (81.3)         | 29 (78.4)      | 10 (90.9)      | 0.662          |
| fvPTC                              | 13 (27.1)         | 12 (32.4)      | 1 (9.1)        | 0.246          |
| tcv/svPTC                          | 6 (12.5)          | 5 (13.5)       | 1 (9.1)        | 1.000          |
| Tumor size (cm)                    | 2.1 ± 1.40        | 2.1 ± 1.38     | 2.1 ± 1.40     | 0.996          |
| Multifocality                      | 36 (75.0)         | 28 (75.7)      | 8 (72.7)       | 1.000          |
| Bilateral lesion                   | 27 (56.3)         | 20 (54.1)      | 7 (63.6)       | 0.733          |
| ETE                                | 37 (77.1)         | 31 (83.8)      | 6 (54.5)       | 0.095          |
| TNM                                |                   |                |                |                |
| T1                                 | 7 (14.6)          | 3 (8.1)        | 4 (36.4)       | 0.039 *        |
| T2-4                               | 41 (85.4)         | 34 (91.9)      | 7 (63.6)       |                |
| N0                                 | 3 (6.3)           | 3 (8.1)        | 0 (0)          | 1.000          |
| N1                                 | 45 (93.8)         | 34 (91.9)      | 11 (100)       |                |
| M0                                 | 26 (54.2)         | 16 (43.2)      | 10 (90.9)      | 0.006 **       |
| M1                                 | 22 (45.8)         | 21 (56.8)      | 1 (9.1)        |                |
| AJCC stage                         |                   |                |                | 0.001 **       |
| I                                  | 22 (45.8)         | 12 (32.4)      | 10 (90.9)      |                |
| II/III/IV                          | 26 (54.2)         | 25 (67.6)      | 1 (9.1)        |                |
| ATA risk stratification            |                   |                |                | 1.000          |
| Low                                | 0 (0)             | 0 (0)          | 0 (0)          |                |
| Intermediate/high                  | 48 (100)          | 37 (100)       | 11 (100)       |                |
| Cumulative dose of RAI (mCi)       | 370 (220, 570)    | 430 (220, 430) | 220 (220, 250) | 0.002 **       |
| Follow up                          |                   |                |                | 0.313          |
| Alive                              | 42 (87.5)         | 31 (83.8)      | 11 (100)       |                |

|     | Dead                                                                                                            | 6 (12.5) | 6 (16.2) | 0 (0) |
|-----|-----------------------------------------------------------------------------------------------------------------|----------|----------|-------|
| 744 | Note: Quantitative variables were displayed as mean $\pm$ standard deviation, whereas qualitative               |          |          |       |
| 745 | variables were displayed as number (ratio). The cumulative dose of RAI was presented as medians                 |          |          |       |
| 746 | (quartiles) due to inconformity to Gaussian distribution.                                                       |          |          |       |
| 747 | <sup>a</sup> Multiple tumors in one patient may exhibit different histopathological types. The diameters of the |          |          |       |
| 748 | largest tumor were measured when multiple lesions existed.                                                      |          |          |       |
| 749 | * $P < 0.05$ , ** $P < 0.01$ .                                                                                  |          |          |       |
| 750 | Abbreviations: AJCC, American Joint Committee on Cancer; ATA, American Thyroid Association;                     |          |          |       |
| 751 | BMI, body mass index; cPTC, classic papillary thyroid cancer; ETE, extrathyroidal extension; fvPTC,             |          |          |       |
| 752 | follicular variant of papillary thyroid cancer; RAI, radioactive iodine; svPTC, solid variant of papillary      |          |          |       |
| 753 | thyroid cancer; tcvPTC, tall cell variant of papillary thyroid cancer.                                          |          |          |       |
| 754 |                                                                                                                 |          |          |       |

755

Table 2. The comparison of gene mutations and fusions in RAI-refractory and RAI-sensitive PTC

| Comparison     | BRAF              | RET      | TERTp             | TP53     | Fusion <sup>a</sup> | RET fusion | NCOA4-RET         |
|----------------|-------------------|----------|-------------------|----------|---------------------|------------|-------------------|
| RR-PTC vs.     |                   |          |                   |          |                     |            |                   |
| Control        |                   |          |                   |          |                     |            |                   |
| RR-PTC (35)    | 19 (54.3)         | 0 (0)    | 6 (17.1)          | 1 (2.9)  | 10 (28.6)           | 8 (22.9)   | 7 (20.0)          |
| Control (10)   | 6 (60.0)          | 1 (10.0) | 0 (0)             | 1 (10.0) | 4 (40.0)            | 2 (20.0)   | 1 (10.0)          |
| <i>P</i> value | 1.000             | 0.222    | 0.312             | 0.399    | 0.700               | 1.000      | 0.661             |
| Subgroups      |                   |          |                   |          |                     |            |                   |
| ID (9)         | <b>1 (11.1) *</b> | 0 (0)    | 1 (11.1)          | 1 (11.1) | 4 (44.4)            | 4 (44.4)   | <b>4 (44.4) *</b> |
| iDF (9)        | 6 (66.7)          | 0 (0)    | <b>3 (33.3) *</b> | 0 (0)    | 1 (11.1)            | 1 (11.1)   | 0 (0)             |
| iDG (17)       | 12 (70.6)         | 0 (0)    | 2 (11.8)          | 0 (0)    | 5 (29.4)            | 3 (17.6)   | 3 (17.6)          |
| Id (10)        | 6 (60.0)          | 1 (10.0) | 0 (0)             | 1 (10.0) | 4 (40.0)            | 2 (20.0)   | 1 (10.0)          |
| <i>P</i> value | 0.026 *           | 0.311    | 0.193             | 0.411    | 0.421               | 0.327      | 0.081             |
| I-131 uptake   |                   |          |                   |          |                     |            |                   |
| Negative (26)  | 18 (69.2)         | 0 (0)    | 5 (19.2)          | 0 (0)    | 6 (23.1)            | 4 (15.4)   | 3 (11.5)          |
| Positive (19)  | 7 (36.8)          | 1 (5.3)  | 1 (5.3)           | 2 (10.5) | 8 (42.1)            | 6 (31.6)   | 5 (26.3)          |
| <i>P</i> value | 0.039 *           | 0.422    | 0.222             | 0.173    | 0.206               | 0.281      | 0.253             |

756

\* *P* < 0.05. Bold font indicated statistical significance revealed by *z* test.

757

<sup>a</sup> Detected gene fusions included *ETV6-NTRK3* in three samples, one *STRN-ALK*, two *CCDC6-RET*

758

and eight *NCOA4-RET*. The latter two fusions were collectively called *RET* fusion.



Figures

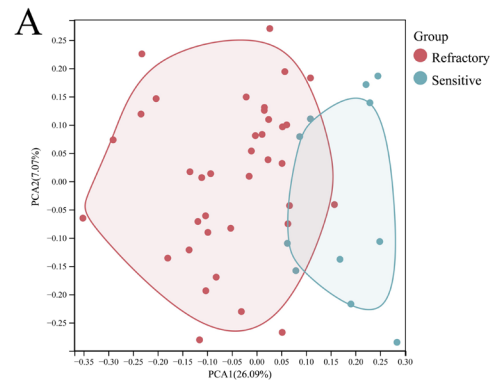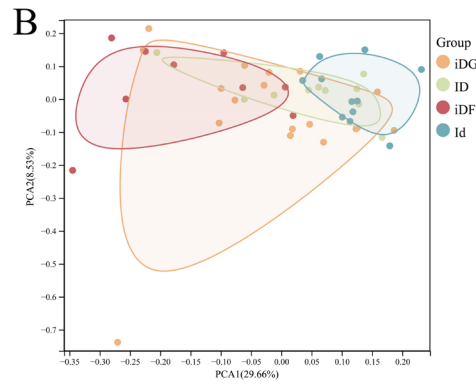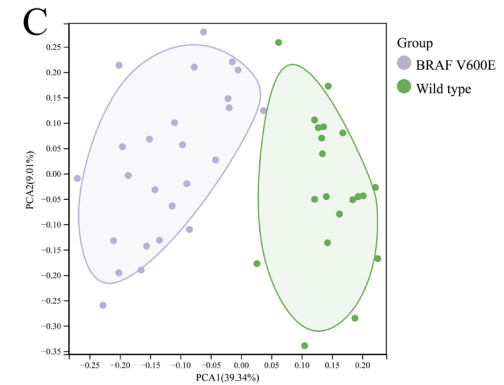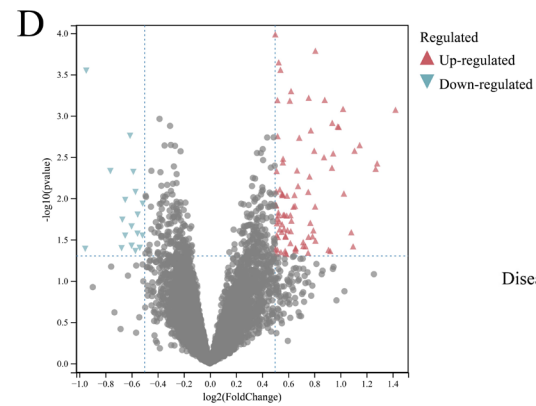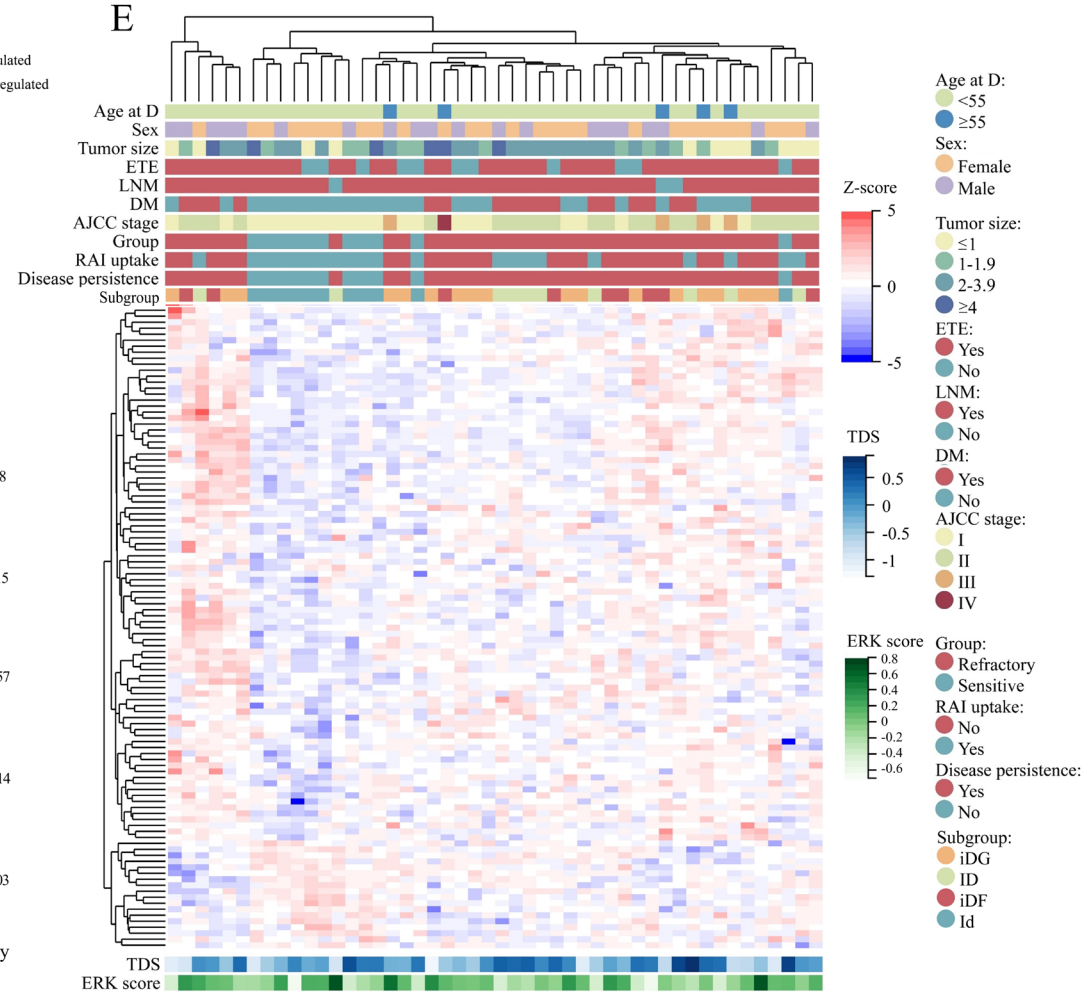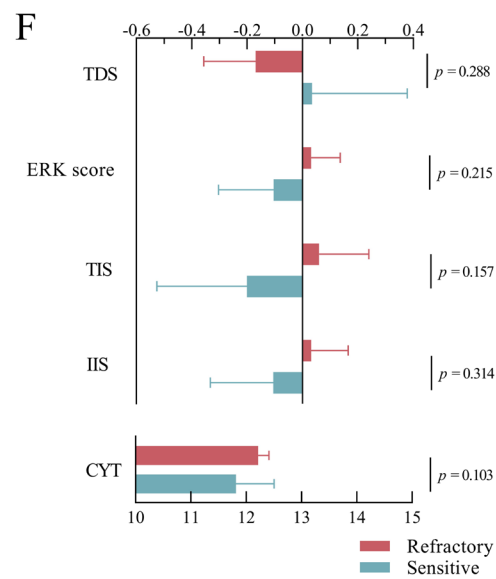

Figure 1. Proteomic overview of RAI-refractory and RAI-sensitive PTC samples. (A-C) Dimension reduction visualization of the analyzed PTC samples. The area covered by the samples represented similarity within a group. The samples were labeled according to their response to I-131 treatment (refractory or sensitive), subgroup (iDF, iDG, ID or Id) and *BRAF* mutation status. Three samples whose quality control for sequencing failed were not included in Figure C. (D) Differential expression analysis of samples in the RR-PTC and control groups. Unadjusted *P* values < 0.05 and absolute FC > 1.414 were defined as thresholds for DEPs. (E) Overview of the proteomic profiles. *Z* scores of the DEPs were calculated. (F) Correlation of scores and groups. Error bar denoted 95% CI. The TDS was lower in the RR-PTC group ( $-0.17 \pm 0.562$  vs.  $0.03 \pm 0.512$ ,  $P = 0.288$ ). Conversely, the ERK score was greater in the RR-PTC group ( $0.03 \pm 0.317$  vs.  $-0.10 \pm 0.297$ ,  $P = 0.215$ ). The means and SDs are presented with boxes and error bars.

Abbreviations: age at D, age at diagnosis; DM, distant metastasis; ETE, extrathyroidal extension; LNM, lymph node metastasis.

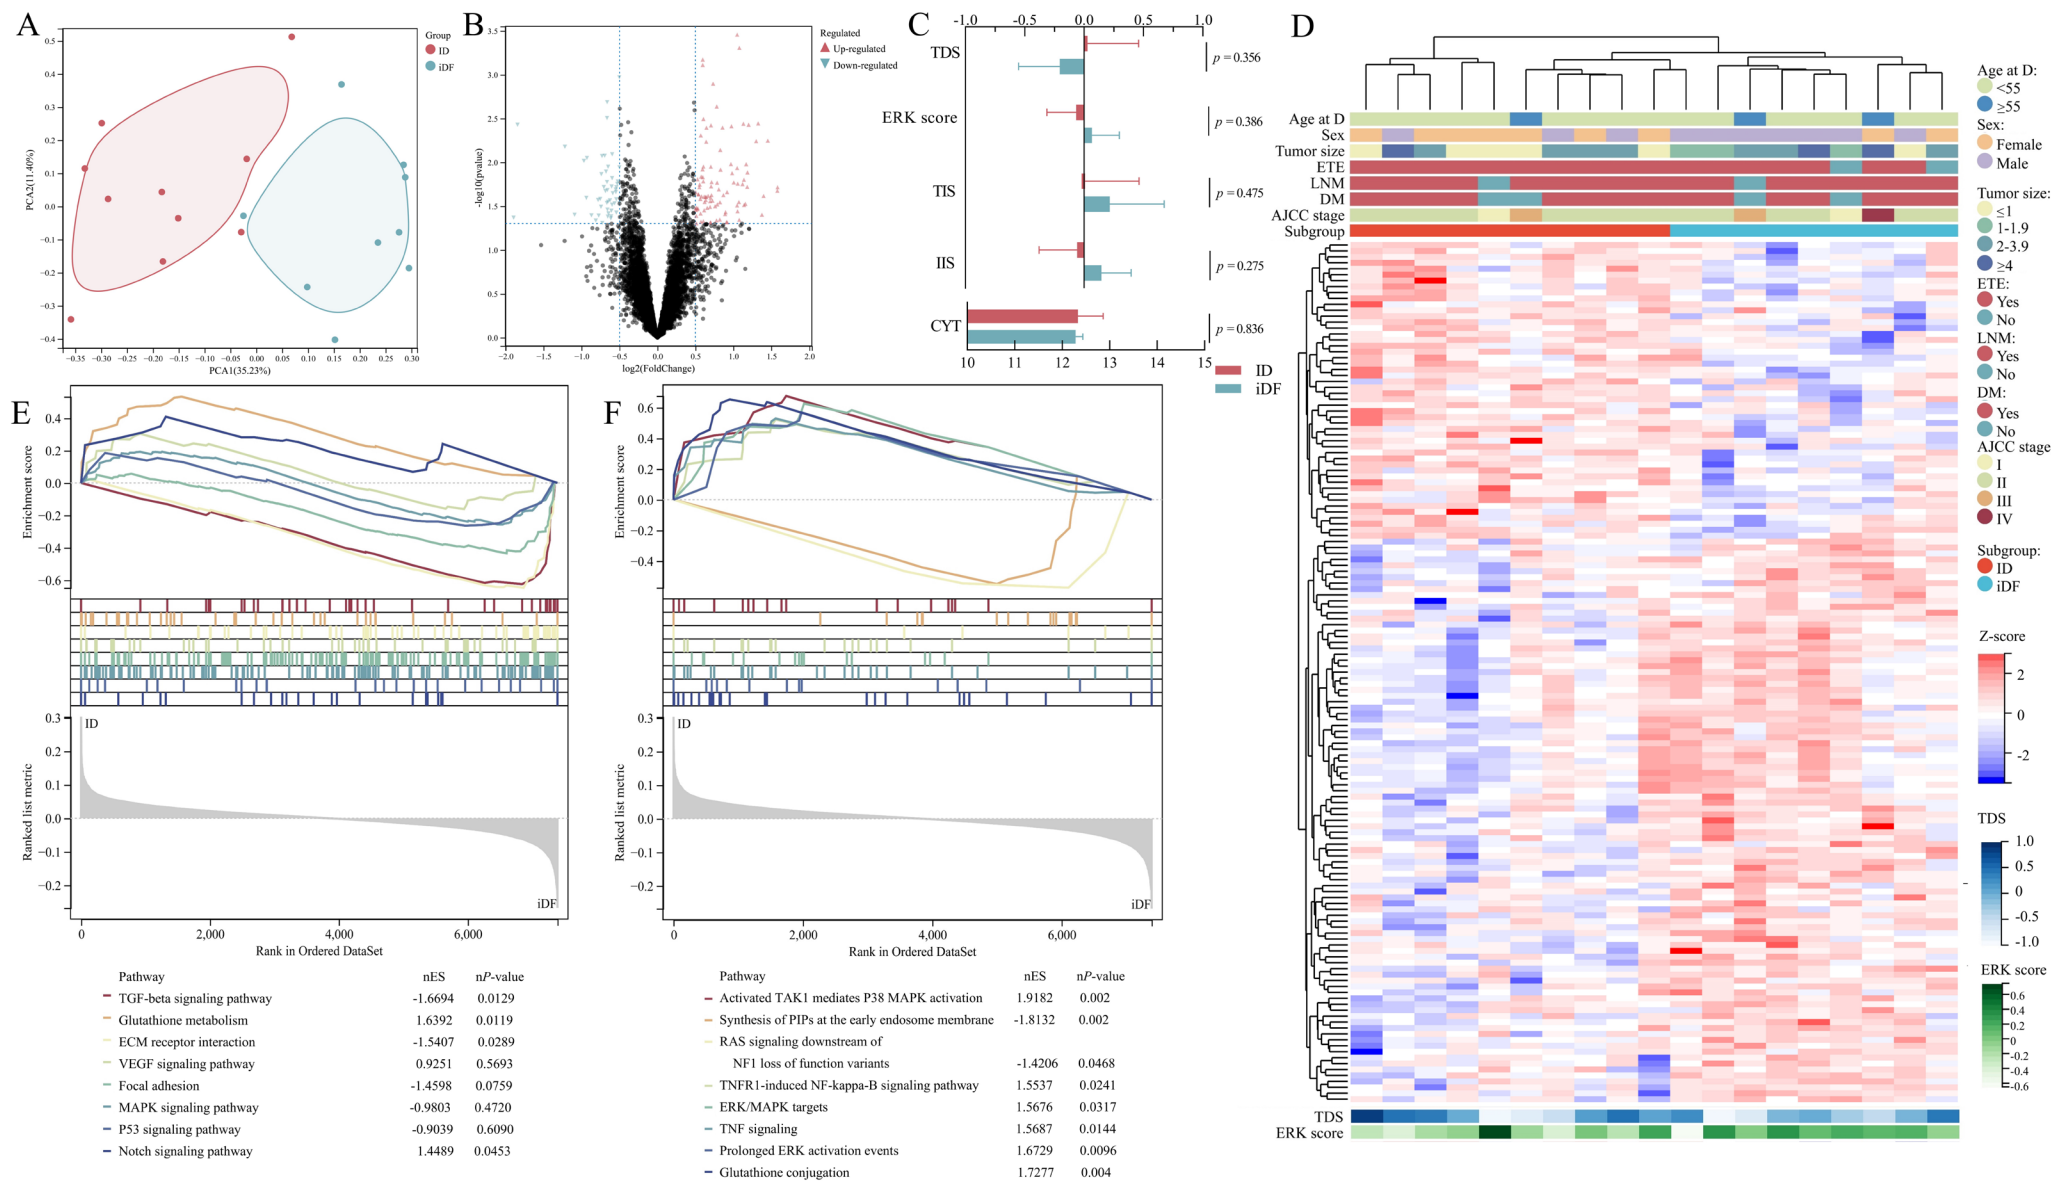

Figure 2. Differential expression analysis of the ID and iDF groups. (A) PCA of the two groups. (B) Differential expression analysis of samples in the two groups. Unadjusted  $P$  values  $< 0.05$

and absolute FC > 1.414 were defined as thresholds for DEPs. (C) Correlations of scores and groups. Error bar denoted 95% CI. The TDS was greater in the ID group ( $0.03 \pm 0.599$  vs.  $-0.20 \pm 0.454$ ,  $P = 0.356$ ), while the ERK score was greater in the iDF group ( $-0.07 \pm 0.345$  vs.  $0.07 \pm 0.300$ ,  $P = 0.386$ ). (D) Expression profiles of 145 DEPs. (E&F) GSEA based on the KEGG and Reactome databases. Sixteen pathways are presented in the plot.

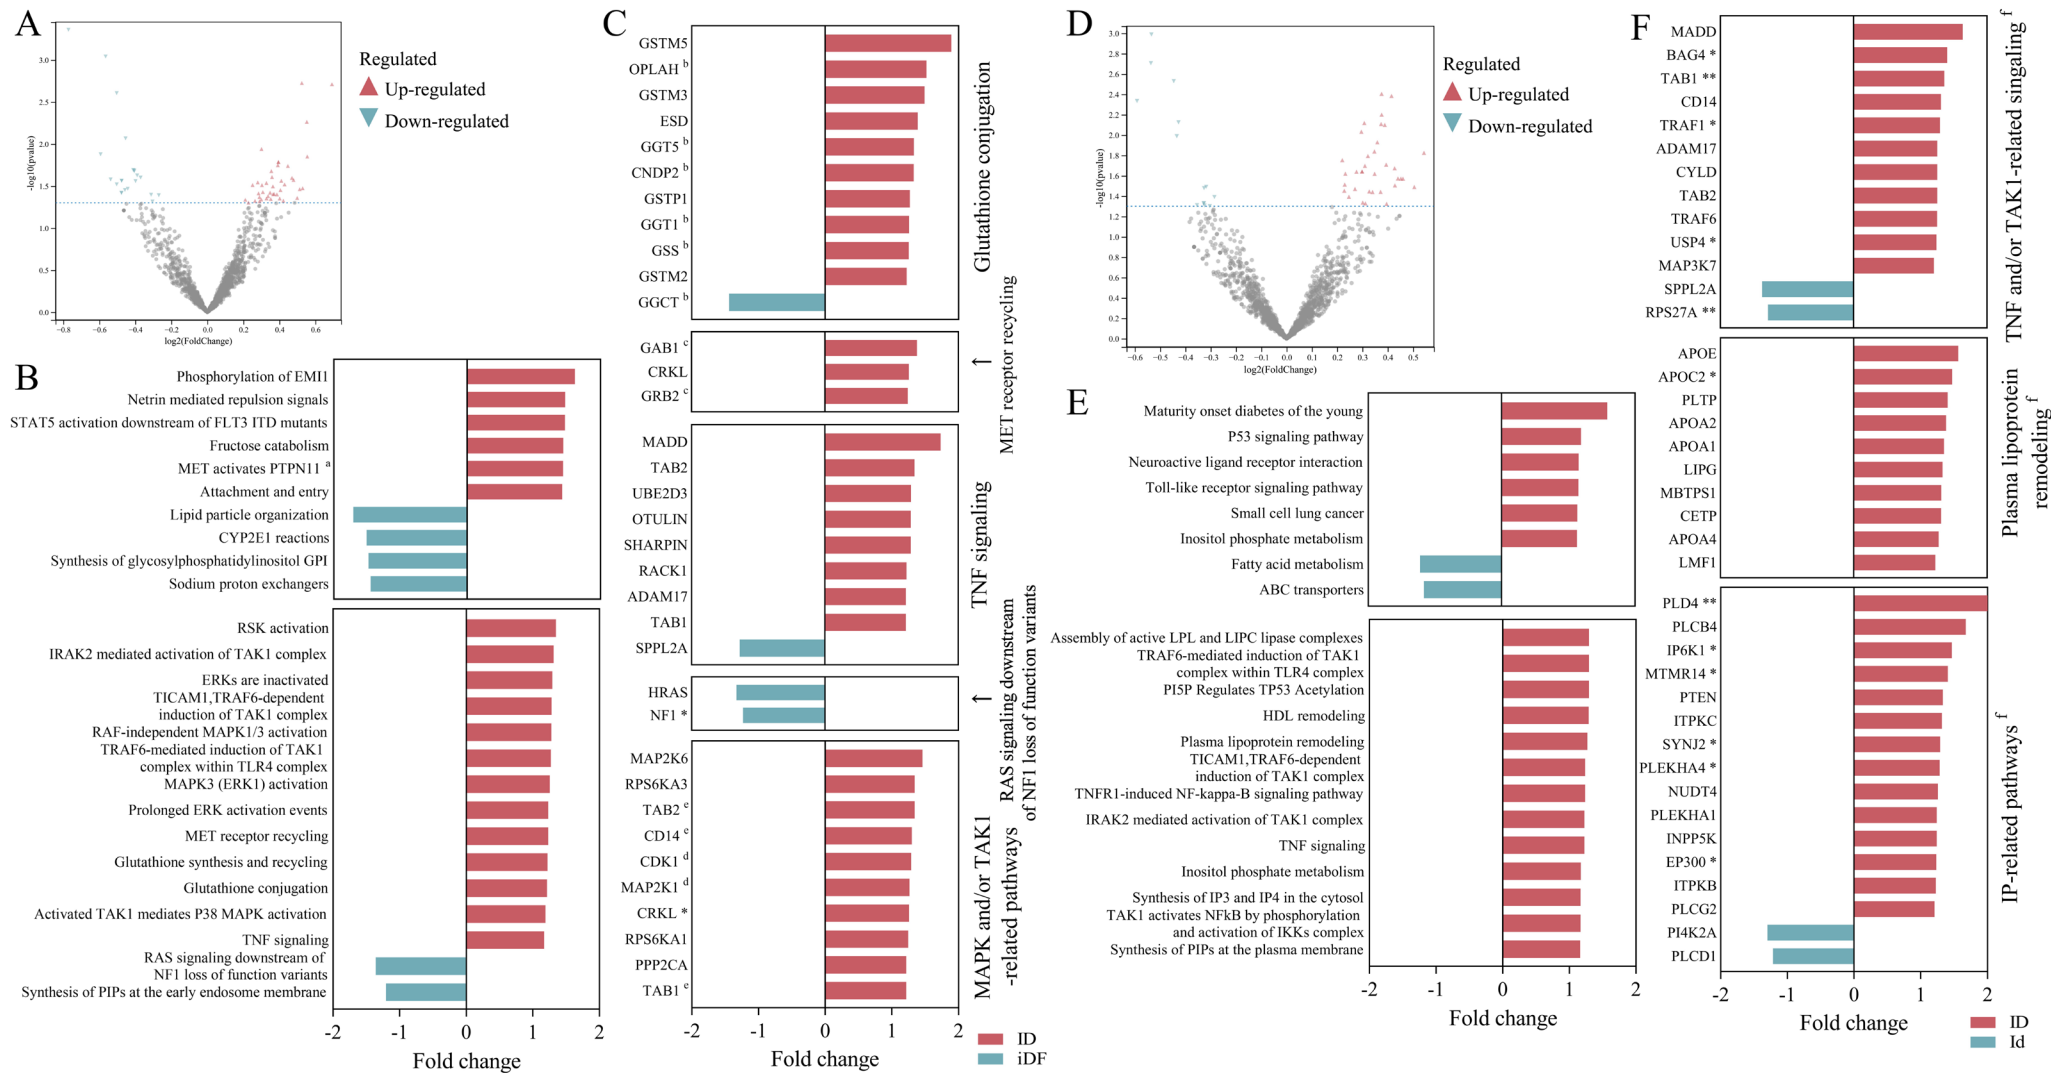

Figure 3. Expression of selected genes according to the enriched pathways identified in the ID vs. iDF and ID vs. Id comparisons. (A&D) Dysregulated pathways identified in the ID vs. iDF and ID vs. Id comparisons. The  $P$  value threshold was 0.05. No threshold was set for fold change. GSEA was conducted based on the Reactome annotation file. (B) The ten most significantly enriched pathways and the thirteen selected pathways. (C) The selected proteins from the thirteen selected pathways. The expression of proteins involved in these thirteen pathways was compared between the RAI-positive and RAI-negative groups. Proteins with an absolute FC > 1.2 were displayed. (E) The eight significantly enriched pathways and thirteen selected

pathways. (F) The selected proteins from the thirteen selected pathways. The TNF signaling pathway and the TAK1-related pathways were combined in a single plot since the proteins strongly overlapped.

\*  $P < 0.05$ , \*\*  $P < 0.01$ .

<sup>a</sup> The pathway “MET activates PTPN1” was also selected for subsequent identification of proteins.

<sup>b, c</sup> Involved in the selected pathways “glutathione synthesis and recycling” and “MET activates PTPN11”, respectively.

<sup>d</sup> Both CDK1 and MAP2K1 participate in the pathways “MAPK3 (ERK1) activation” and “RAF-independent MAPK1/3 activation”, and MAP2K1 is also a participant in “prolonged ERK activation events”.

<sup>e</sup> TAB2 and TAB1 are involved in both MAPK and TAK1-associated pathways, while CD14 participates in TAK1-associated pathways.

<sup>f</sup> Molecules in these figures might participate in several pathways. The associations of molecules and pathways are provided in Sup table S5.

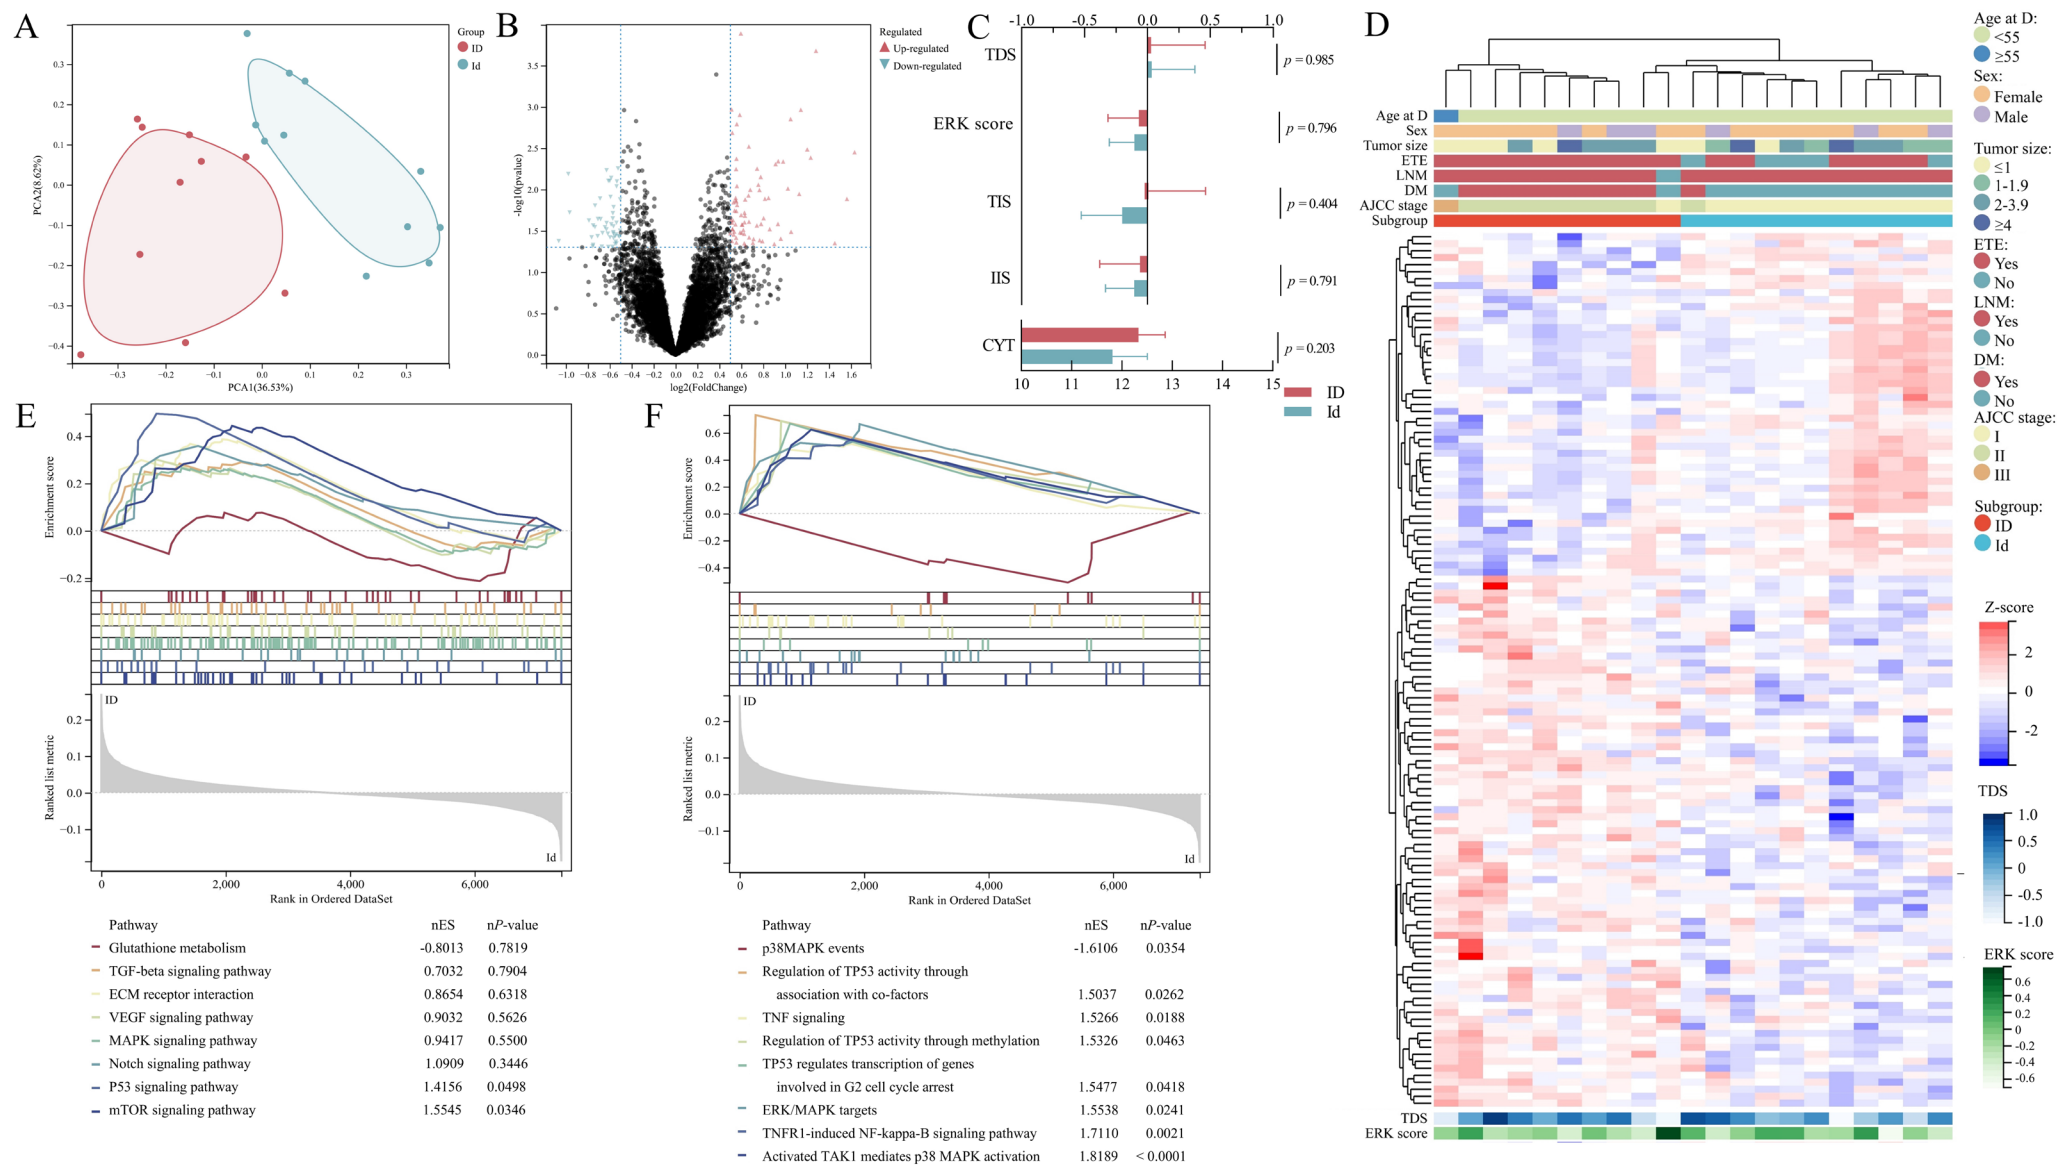

Figure 4. Differential expression analysis of the ID and Id groups. (A) PCA of the two groups. (B) Differential expression analysis of samples in the two groups. Unadjusted  $P$  values  $< 0.05$



and absolute FC > 1.414 were defined as thresholds for DEPs. (C) Correlations of scores and groups. Error bar denoted 95% CI. No significant difference was found in the TDS ( $0.03 \pm 0.599$  vs.  $0.03 \pm 0.512$ ,  $P = 0.985$ ) or ERK score ( $-0.07 \pm 0.345$  vs.  $-0.10 \pm 0.297$ ,  $P = 0.796$ ). (D) Expression profiles of 125 DEPs. (E&F) GSEA based on the KEGG and Reactome databases. Sixteen pathways are presented in the plot.

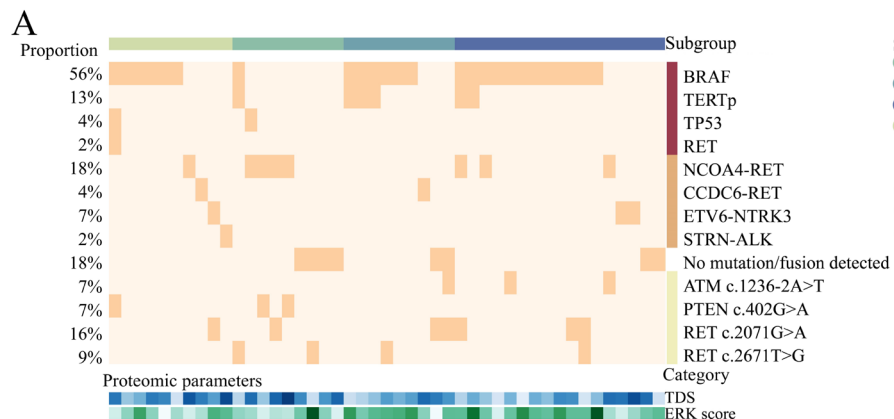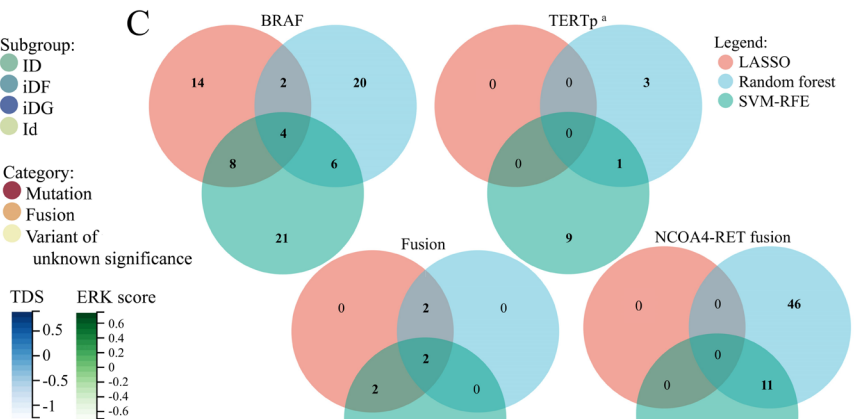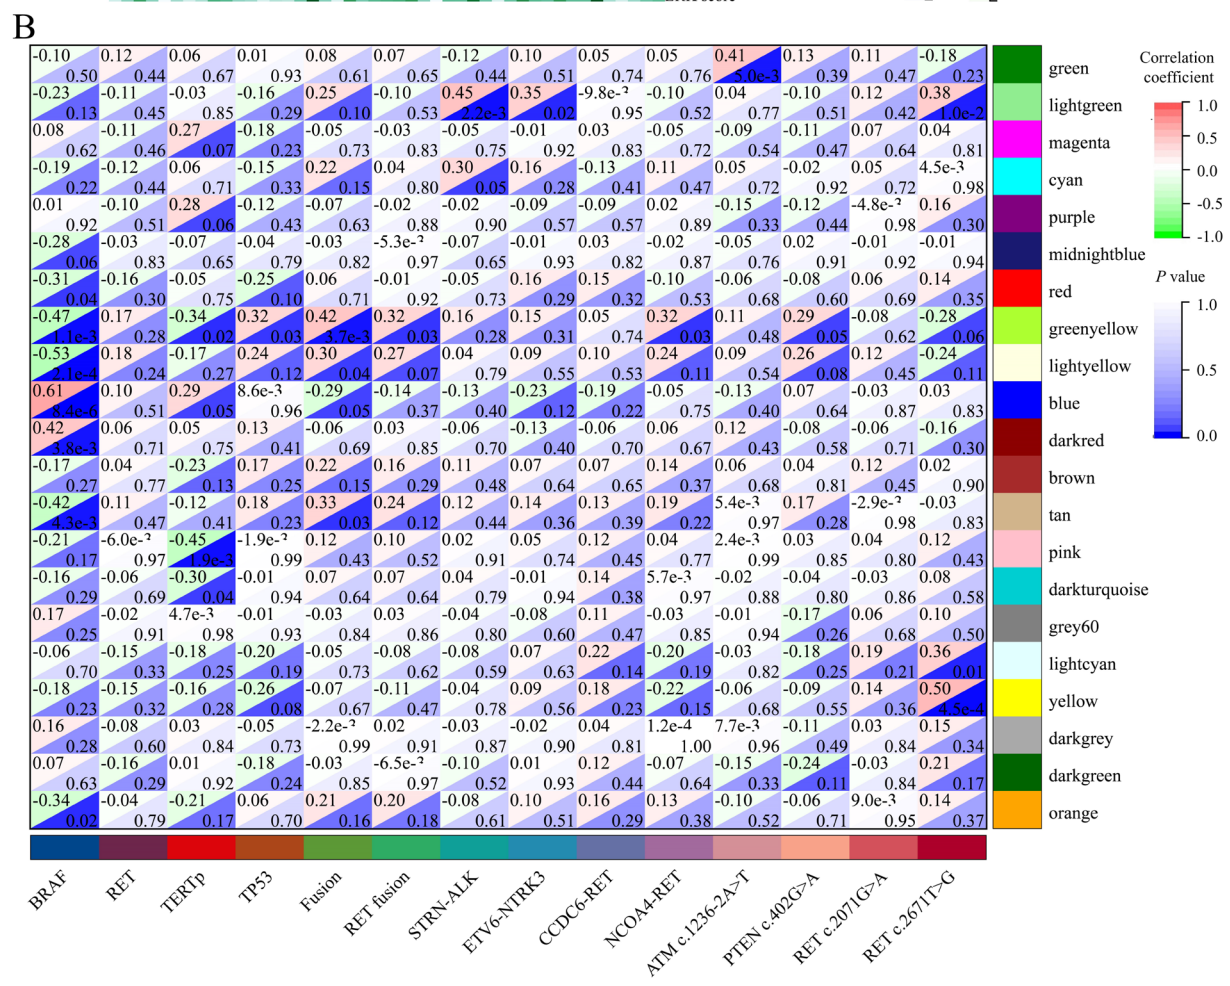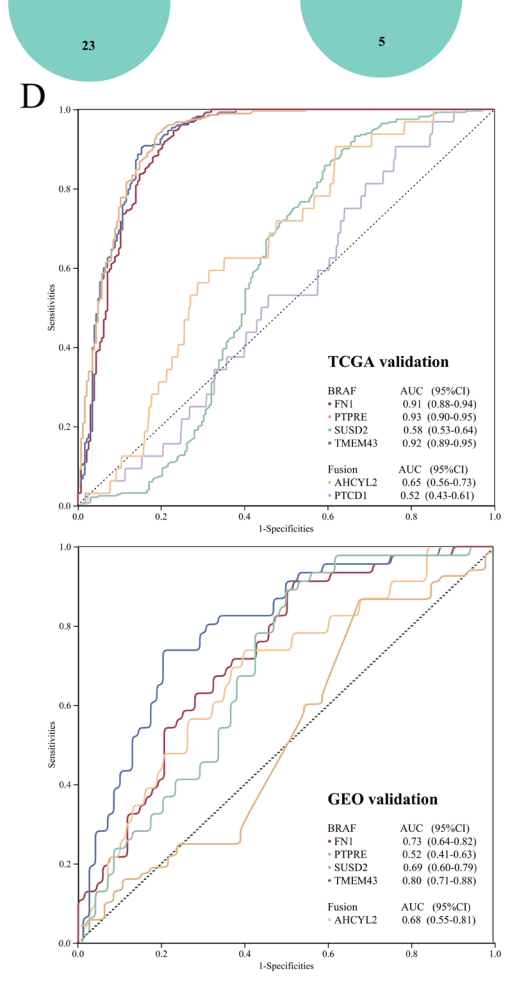

Figure 5. Gene variants and WGCNA. (A) Gene variance landscape. (B) Correlations of gene modules and gene phenotypes. The cells were divided into upper left (correlation coefficient) and lower right (*P* value) parts. (C) The intersection of LASSO-, RF- and SVM-RFE-identified biomarkers for *BRAF*, and *TERTp* mutations, gene fusions and *NCOA4-RET* fusion. (D) Validation of six genes in the TCGA-THCA cohort and merged GEO cohort. *PTCD1* was not detected in the merged GEO dataset.

<sup>a</sup> The low number of *TERTp*-positive samples ( $n = 6$ ) prevented model construction and error analysis for *TERTp* mutations via the SVM algorithm. The first ten proteins with the top average rank were processed for biomarker identification.

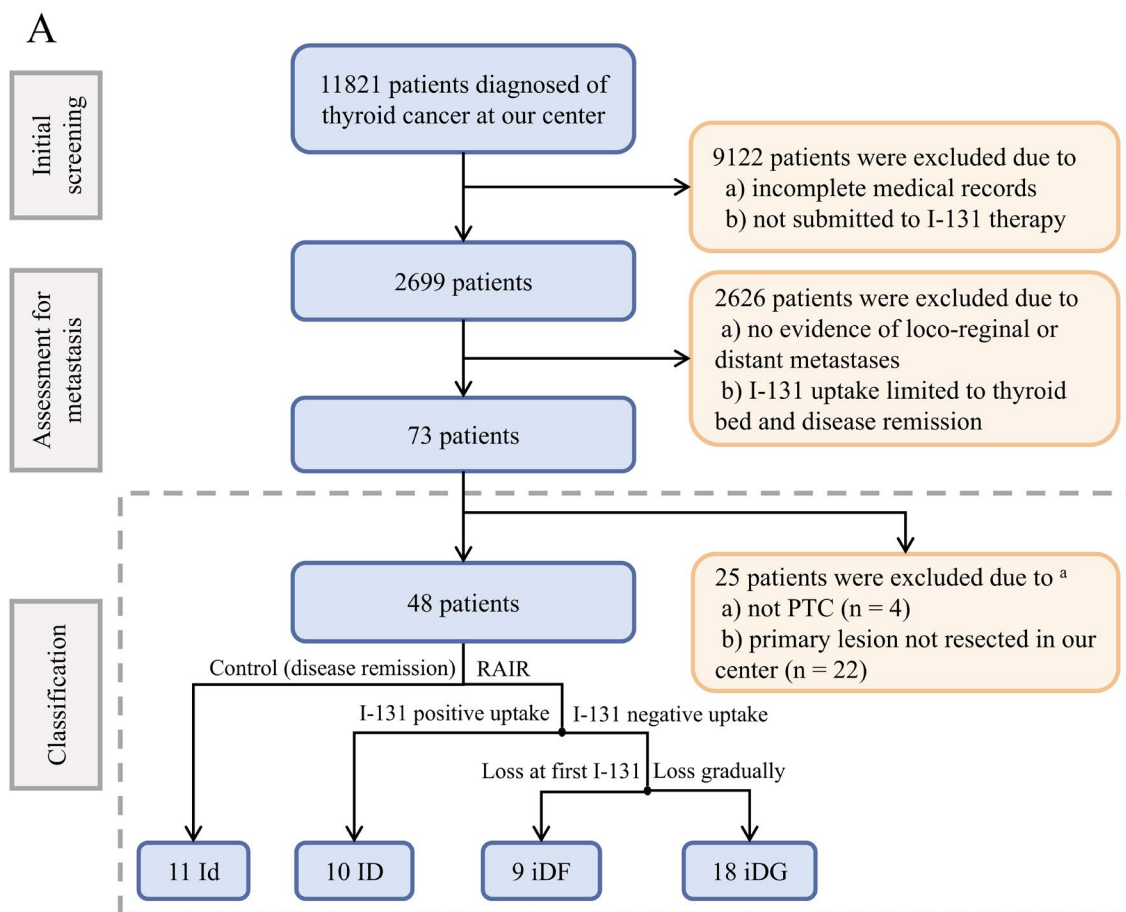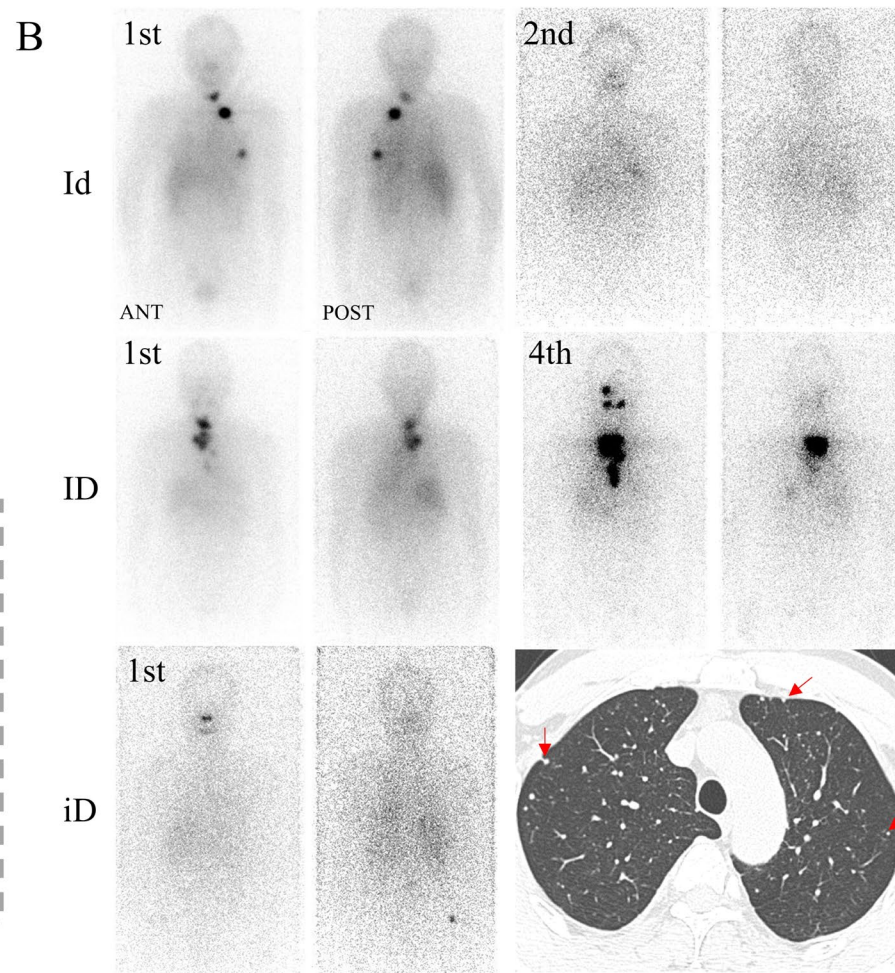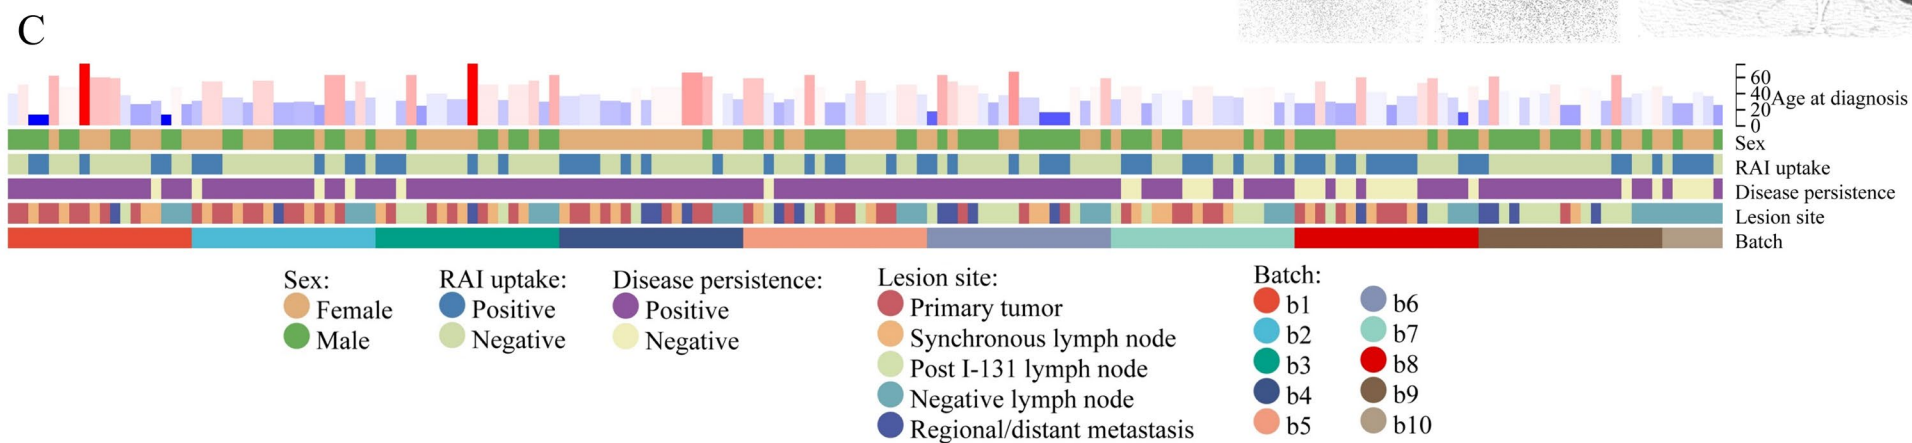

Figure 6. (A) Flow chart of patient and sample selection. Strict criteria were applied to identify eligible patients. Individuals with insufficient radiological evidence were excluded from the second round of selection. A total of 73 patients (in the dashed box) had regional or distant metastatic lesions with solid evidence. The FFPE tissues were collected for subsequent proteomic analysis and/or TNGS. Notably, 25 patients were excluded from this study due to a lack of primary lesions or not having PTC. (B) Grouping of included patients. Three samples are shown here for the Id, ID and iD groups. The first patient belonged to the Id group. Her/his lung metastases, which were confirmed by I-131 WBS and chest CT, were eliminated by two I-131 treatments. The second patient was included in the ID group. She/he received total thyroidectomy but her/his cervical regional metastatic lesion progressed during the four rounds of I-131 treatment. The first and second I-131 WBSs of the third patient revealed no positive focus. However, PET/CT during the same period revealed several suspicious pulmonary nodules (red arrow), which were confirmed to be metastases by subsequent surgery and histopathology. (C) Information on the collected FFPE samples. The protein profiles of 168 samples were evaluated in 10 batches. The sample types included primary lesions, synchronous and post I-131 cervical LNM, negative cervical lymph node and regional or distant metastatic lesions. Notably, the regional metastatic lesions were tumors near the primary site, such as the esophagus, trachea and cervical skin. LNM was not included in regional metastatic lesions. In addition, forty-eight primary tumors were examined via TNGS.

<sup>a</sup> The primary lesion of one patient was neither resected in our center nor examined to be PTC.

Supplementary materials

Additional discussion

Supplementary methods

Supplementary tables

Supplementary figures

References

See attached files.
